# Supplementary material for: At Lunch with a Killer: The Effect of Weaver Ants on Host-Parasitoid Interactions on Mango
Source: PLoS One. 2017 Feb 1;12(2):e0170101. doi: 10.1371/journal.pone.0170101 (PMC5287459; doi:10.1371/journal.pone.0170101)
Supplement: S1 Dataset — (XLSX) [file pone.0170101.s001.xlsx]

## Sheet: Migani et al.
species	treatment	No. of eggs/parasitized hosts	total hosts	Trial	Cage
Bactrocera.dorsalis	ant	86	NA	1	2
Bactrocera.dorsalis	ant	82	NA	2	4
Bactrocera.dorsalis	ant	0	NA	1	2
Bactrocera.dorsalis	ant	61	NA	2	4
Bactrocera.dorsalis	ant	0	NA	3	2
Bactrocera.dorsalis	ant	112	NA	4	4
Bactrocera.dorsalis	ant	6	NA	3	2
Bactrocera.dorsalis	ant	109	NA	5	3
Bactrocera.dorsalis	ant	90	NA	6	1
Bactrocera.dorsalis	ant	4	NA	7	1
Bactrocera.dorsalis	ant	0	NA	8	2
Bactrocera.dorsalis	ant	0	NA	7	2
Bactrocera.dorsalis	ant	74	NA	9	2
Bactrocera.dorsalis	ant	86	NA	9	2
Bactrocera.dorsalis	ant	121	NA	10	3
Bactrocera.dorsalis	ant	0	NA	11	1
Bactrocera.dorsalis	ant	25	NA	12	2
Bactrocera.dorsalis	ant	44	NA	11	1
Bactrocera.dorsalis	ant	139	NA	13	1
Bactrocera.dorsalis	ant	98	NA	13	1
Bactrocera.dorsalis	control	152	NA	1	1
Bactrocera.dorsalis	control	377	NA	2	3
Bactrocera.dorsalis	control	241	NA	1	1
Bactrocera.dorsalis	control	466	NA	2	3
Bactrocera.dorsalis	control	0	NA	3	1
Bactrocera.dorsalis	control	285	NA	4	3
Bactrocera.dorsalis	control	0	NA	3	1
Bactrocera.dorsalis	control	347	NA	5	4
Bactrocera.dorsalis	control	229	NA	6	3
Bactrocera.dorsalis	control	20	NA	7	3
Bactrocera.dorsalis	control	136	NA	8	4
Bactrocera.dorsalis	control	41	NA	7	4
Bactrocera.dorsalis	control	293	NA	9	1
Bactrocera.dorsalis	control	233	NA	9	1
Bactrocera.dorsalis	control	460	NA	10	4
Bactrocera.dorsalis	control	316	NA	11	2
Bactrocera.dorsalis	control	131	NA	12	3
Bactrocera.dorsalis	control	256	NA	11	3
Bactrocera.dorsalis	control	350	NA	13	3
Bactrocera.dorsalis	control	310	NA	13	3
Ceratitis.cosyra	ant	50	NA	1	2
Ceratitis.cosyra	control	183	NA	1	1
Ceratitis.cosyra	control	144	NA	2	4
Ceratitis.cosyra	ant	102	NA	2	3
Ceratitis.cosyra	ant	38	NA	2	4
Ceratitis.cosyra	control	264	NA	2	3
Ceratitis.cosyra	ant	155	NA	3	1
Ceratitis.cosyra	control	204	NA	3	3
Ceratitis.cosyra	control	261	NA	3	3
Ceratitis.cosyra	ant	71	NA	3	1
Ceratitis.cosyra	control	165	NA	4	2
Ceratitis.cosyra	ant	53	NA	4	4
Ceratitis.cosyra	control	129	NA	5	2
Ceratitis.cosyra	ant	38	NA	5	4
Ceratitis.cosyra	ant	58	NA	6	1
Ceratitis.cosyra	control	290	NA	6	3
Ceratitis.cosyra	ant	81	NA	7	2
Ceratitis.cosyra	control	240	NA	7	4
Ceratitis.cosyra	ant	150	NA	6	1
Ceratitis.cosyra	control	289	NA	6	3
Ceratitis.cosyra	ant	188	NA	7	2
Ceratitis.cosyra	control	179	NA	7	4
Ceratitis.cosyra	ant	57	NA	8	3
Ceratitis.cosyra	control	175	NA	8	2
Ceratitis.cosyra	control	148	NA	9	1
Ceratitis.cosyra	ant	93	NA	9	4
Ceratitis.cosyra	control	283	NA	10	4
Ceratitis.cosyra	ant	84	NA	10	1
Ceratitis.cosyra	ant	58	NA	11	3
Ceratitis.cosyra	control	269	NA	11	2
Ceratitis.cosyra	ant	80	NA	10	1
Ceratitis.cosyra	control	216	NA	10	4
Ceratitis.cosyra	ant	127	NA	11	3
Ceratitis.cosyra	control	222	NA	11	2
Ceratitis.cosyra	control	215	NA	12	2
Ceratitis.cosyra	ant	81	NA	12	1
Ceratitis.cosyra	ant	164	NA	13	3
Ceratitis.cosyra	control	256	NA	13	4
Ceratitis.cosyra	control	144	NA	12	2
Ceratitis.cosyra	ant	91	NA	12	1
Diachasmimorpha.longicaudata	ant	7	40	1	2
Diachasmimorpha.longicaudata	control	13	40	1	1
Diachasmimorpha.longicaudata	ant	1	40	1	2
Diachasmimorpha.longicaudata	control	11	40	1	1
Diachasmimorpha.longicaudata	control	23	40	2	3
Diachasmimorpha.longicaudata	ant	12	40	2	4
Diachasmimorpha.longicaudata	ant	11	40	2	4
Diachasmimorpha.longicaudata	control	28	40	2	3
Diachasmimorpha.longicaudata	ant	1	40	3	1
Diachasmimorpha.longicaudata	control	14	40	3	3
Diachasmimorpha.longicaudata	ant	3	40	3	1
Diachasmimorpha.longicaudata	control	14	40	3	3
Diachasmimorpha.longicaudata	control	17	40	4	2
Diachasmimorpha.longicaudata	ant	7	40	4	4
Diachasmimorpha.longicaudata	control	24	40	4	2
Diachasmimorpha.longicaudata	ant	16	40	4	4
Diachasmimorpha.longicaudata	ant	17	40	5	2
Diachasmimorpha.longicaudata	control	36	40	5	4
Diachasmimorpha.longicaudata	ant	2	40	6	3
Diachasmimorpha.longicaudata	control	16	40	6	1
Diachasmimorpha.longicaudata	ant	15	40	6	3
Diachasmimorpha.longicaudata	control	31	40	6	1
Diachasmimorpha.longicaudata	control	30	40	7	2
Diachasmimorpha.longicaudata	ant	12	40	7	3
Diachasmimorpha.longicaudata	ant	12	40	8	1
Diachasmimorpha.longicaudata	control	22	40	8	4
Diachasmimorpha.longicaudata	control	12	40	8	4
Diachasmimorpha.longicaudata	ant	7	40	8	1
Diachasmimorpha.longicaudata	control	14	40	9	3
Diachasmimorpha.longicaudata	ant	3	40	9	1
Diachasmimorpha.longicaudata	control	19	40	9	3
Diachasmimorpha.longicaudata	ant	5	40	9	1
Diachasmimorpha.longicaudata	control	20	40	10	2
Diachasmimorpha.longicaudata	ant	4	40	10	4
Diachasmimorpha.longicaudata	ant	2	40	10	4
Diachasmimorpha.longicaudata	control	24	40	10	2
Diachasmimorpha.longicaudata	ant	3	40	11	1
Diachasmimorpha.longicaudata	control	25	40	11	2
Diachasmimorpha.longicaudata	control	23	40	12	2
Diachasmimorpha.longicaudata	ant	9	40	12	1
Fopius.arisanus	ant	3	106	1	3
Fopius.arisanus	control	15	109	1	1
Fopius.arisanus	ant	1	100	1	3
Fopius.arisanus	control	2	98	1	1
Fopius.arisanus	ant	18	101	2	4
Fopius.arisanus	control	22	102	2	2
Fopius.arisanus	ant	2	62	3	2
Fopius.arisanus	control	39	72	3	3
Fopius.arisanus	ant	3	59	3	2
Fopius.arisanus	control	0	11	3	3
Fopius.arisanus	ant	8	70	4	1
Fopius.arisanus	control	21	73	4	4
Fopius.arisanus	ant	4	75	4	1
Fopius.arisanus	control	12	84	4	4
Fopius.arisanus	control	15	78	5	2
Fopius.arisanus	ant	18	84	5	3
Fopius.arisanus	ant	19	92	6	1
Fopius.arisanus	control	26	99	6	4
Fopius.arisanus	control	20	105	6	4
Fopius.arisanus	ant	9	122	6	1
Fopius.arisanus	control	12	141	7	1
Fopius.arisanus	ant	2	148	7	2
Fopius.arisanus	ant	10	80	7	2
Fopius.arisanus	control	13	72	7	1
Fopius.arisanus	control	7	92	7	4
Fopius.arisanus	ant	4	81	7	3
Fopius.arisanus	control	14	94	8	3
Fopius.arisanus	ant	5	98	8	1
Fopius.arisanus	control	12	94	8	3
Fopius.arisanus	ant	9	91	8	1
Fopius.arisanus	ant	11	96	9	1
Fopius.arisanus	control	31	94	9	2
Fopius.arisanus	ant	16	97	9	1
Fopius.arisanus	control	26	98	9	2
Fopius.arisanus	control	41	94	10	2
Fopius.arisanus	ant	17	100	10	4
