# Supplementary material for: At Lunch with a Killer: The Effect of Weaver Ants on Host-Parasitoid Interactions on Mango
Source: PLoS One. 2017 Feb 1;12(2):e0170101. doi: 10.1371/journal.pone.0170101 (PMC5287459; doi:10.1371/journal.pone.0170101)
Supplement: S3 Dataset — (XLSX) [file pone.0170101.s003.xlsx]

## Sheet: Migani et al.
species	female	No of ants on mango	oviposition	probing	No. encounters in the cage	No. of encounters on mango	fruit revisit	start	stop	status	trialtime
Bactrocera.dorsalis	1	0	0	0	3	0	0	0	102.5	0	102.5
Bactrocera.dorsalis	1	0	0	1	3	0	0	102.5	110.7	0	110.7
Bactrocera.dorsalis	1	1	0	1	3	0	0	110.7	169.1	0	169.1
Bactrocera.dorsalis	1	1	0	1	3	1	0	169.1	192.5	0	192.5
Bactrocera.dorsalis	1	1	0	1	3	1	0	192.5	287	1	287
Bactrocera.dorsalis	2	0	0	0	0	0	0	0	45.5	0	45.5
Bactrocera.dorsalis	2	0	0	0	0	0	0	45.5	284.1	0	284.1
Bactrocera.dorsalis	2	0	0	0	0	0	0	284.1	659.7	1	659.7
Bactrocera.dorsalis	2	0	0	0	0	0	1	0	51.7	0	51.7
Bactrocera.dorsalis	2	0	0	0	0	0	1	51.7	838.4	1	838.4
Bactrocera.dorsalis	2	0	0	0	1	0	2	0	34.4	0	34.4
Bactrocera.dorsalis	2	1	0	0	1	0	2	34.4	82.9	0	82.9
Bactrocera.dorsalis	2	1	0	0	1	0	2	82.9	531.5	1	531.5
Bactrocera.dorsalis	2	1	0	0	2	0	3	0	152.5	0	152.5
Bactrocera.dorsalis	2	1	0	0	2	1	3	152.5	165	0	165
Bactrocera.dorsalis	2	1	0	0	2	1	3	165	224.3	1	224.3
Bactrocera.dorsalis	2	1	0	0	2	0	4	0	250.5	0	250.5
Bactrocera.dorsalis	2	0	0	0	2	0	4	250.5	710.3	0	710.3
Bactrocera.dorsalis	2	1	0	0	2	0	4	710.3	1038.9	0	1038.9
Bactrocera.dorsalis	2	1	0	0	2	0	4	1038.9	1093.9	1	1093.9
Bactrocera.dorsalis	2	1	0	0	2	0	5	0	66.1	0	66.1
Bactrocera.dorsalis	2	0	0	0	2	0	5	66.1	330.7	0	330.7
Bactrocera.dorsalis	3	0	0	0	0	0	0	0	53.6	0	53.6
Bactrocera.dorsalis	3	0	0	0	0	0	0	53.6	64.2	0	64.2
Bactrocera.dorsalis	3	0	0	1	0	0	0	64.2	103.9	0	103.9
Bactrocera.dorsalis	3	0	0	1	0	0	0	103.9	156.3	0	156.3
Bactrocera.dorsalis	3	0	0	2	0	0	0	156.3	223.8	0	223.8
Bactrocera.dorsalis	3	0	0	2	0	0	0	223.8	229	0	229
Bactrocera.dorsalis	3	0	0	3	0	0	0	229	260.8	0	260.8
Bactrocera.dorsalis	3	1	0	3	0	0	0	260.8	271.1	0	271.1
Bactrocera.dorsalis	3	1	0	3	0	0	0	271.1	322.8	0	322.8
Bactrocera.dorsalis	3	1	0	4	0	0	0	322.8	370.3	0	370.3
Bactrocera.dorsalis	3	1	1	4	0	0	0	370.3	395.5	0	395.5
Bactrocera.dorsalis	3	1	1	4	0	0	0	395.5	418	0	418
Bactrocera.dorsalis	3	1	1	5	0	0	0	418	441	0	441
Bactrocera.dorsalis	3	1	1	5	0	0	0	441	514.4	0	514.4
Bactrocera.dorsalis	3	1	2	5	0	0	0	514.4	515.6	0	515.6
Bactrocera.dorsalis	3	1	2	5	0	0	0	515.6	533.6	0	533.6
Bactrocera.dorsalis	3	1	2	5	0	1	0	533.6	559.3	0	559.3
Bactrocera.dorsalis	3	1	2	6	0	1	0	559.3	632.5	0	632.5
Bactrocera.dorsalis	3	1	3	6	0	1	0	632.5	640.9	0	640.9
Bactrocera.dorsalis	3	1	3	6	0	2	0	640.9	675	0	675
Bactrocera.dorsalis	3	1	3	6	0	2	0	675	683.1	1	683.1
Bactrocera.dorsalis	3	1	3	6	0	0	1	0	45.7	0	45.7
Bactrocera.dorsalis	3	1	3	7	0	0	1	45.7	217.1	0	217.1
Bactrocera.dorsalis	3	1	4	7	0	0	1	217.1	225	0	225
Bactrocera.dorsalis	3	1	4	7	0	1	1	225	255.3	0	255.3
Bactrocera.dorsalis	3	1	4	7	0	1	1	255.3	440.9	1	440.9
Bactrocera.dorsalis	3	1	4	7	0	0	2	0	7.6	0	7.6
Bactrocera.dorsalis	3	1	4	7	0	0	2	7.6	175.6	0	175.6
Bactrocera.dorsalis	3	1	4	7	0	0	2	175.6	193.1	0	193.1
Bactrocera.dorsalis	3	1	4	8	0	0	2	193.1	194.6	0	194.6
Bactrocera.dorsalis	3	1	5	8	0	0	2	194.6	233.3	0	233.3
Bactrocera.dorsalis	4	1	0	0	3	0	0	0	30.2	0	30.2
Bactrocera.dorsalis	4	1	0	0	3	0	0	30.2	43.6	0	43.6
Bactrocera.dorsalis	4	1	0	1	3	0	0	43.6	85.6	0	85.6
Bactrocera.dorsalis	4	1	0	1	4	1	0	85.6	172.3	0	172.3
Bactrocera.dorsalis	4	1	0	1	4	1	0	172.3	191	0	191
Bactrocera.dorsalis	4	1	0	1	4	1	0	191	298.3	0	298.3
Bactrocera.dorsalis	4	1	1	1	4	1	0	298.3	303.9	0	303.9
Bactrocera.dorsalis	4	1	1	1	4	2	0	303.9	313.2	0	313.2
Bactrocera.dorsalis	4	1	1	1	4	2	0	313.2	333.1	0	333.1
Bactrocera.dorsalis	4	1	1	2	5	2	0	333.1	372	0	372
Bactrocera.dorsalis	4	1	1	2	5	2	0	372	382.4	1	382.4
Bactrocera.dorsalis	4	1	1	2	5	0	1	0	10.4	0	10.4
Bactrocera.dorsalis	4	1	1	2	5	1	1	10.4	37.9	0	37.9
Bactrocera.dorsalis	4	1	1	2	5	2	1	37.9	82.7	0	82.7
Bactrocera.dorsalis	4	1	1	2	5	2	1	82.7	128.1	1	128.1
Bactrocera.dorsalis	4	1	1	2	5	0	2	0	13.7	0	13.7
Bactrocera.dorsalis	4	1	1	2	5	1	2	13.7	17	0	17
Bactrocera.dorsalis	4	1	1	2	5	1	2	17	86.8	1	86.8
Bactrocera.dorsalis	4	1	1	2	5	0	3	86.8	94	0	94
Bactrocera.dorsalis	4	1	1	2	5	1	3	94	97.5	0	97.5
Bactrocera.dorsalis	4	1	1	2	5	1	3	97.5	121.6	1	121.6
Bactrocera.dorsalis	4	2	1	2	5	0	4	0	161.1	0	161.1
Bactrocera.dorsalis	4	2	1	2	5	0	4	161.1	269.9	0	269.9
Bactrocera.dorsalis	4	2	1	3	5	0	4	269.9	392.7	0	392.7
Bactrocera.dorsalis	4	2	1	3	5	0	4	392.7	500.1	0	500.1
Bactrocera.dorsalis	4	2	1	3	5	1	4	500.1	506.3	0	506.3
Bactrocera.dorsalis	4	2	1	3	5	1	4	506.3	588	1	588
Bactrocera.dorsalis	5	0	0	0	0	0	0	0	38.8	0	38.8
Bactrocera.dorsalis	5	0	0	0	0	0	0	38.8	113.4	0	113.4
Bactrocera.dorsalis	5	0	0	0	0	1	0	113.4	125.1	0	125.1
Bactrocera.dorsalis	5	0	0	0	0	1	0	125.1	143.4	1	143.4
Bactrocera.dorsalis	5	0	0	0	1	0	1	0	8.4	0	8.4
Bactrocera.dorsalis	5	0	0	0	1	1	1	8.4	11.8	0	11.8
Bactrocera.dorsalis	5	0	0	0	1	1	1	11.8	33.9	1	33.9
Bactrocera.dorsalis	5	2	0	0	1	0	2	0	44	0	44
Bactrocera.dorsalis	5	2	0	1	1	0	2	44	66.9	0	66.9
Bactrocera.dorsalis	5	2	0	1	1	1	2	66.9	68.3	0	68.3
Bactrocera.dorsalis	5	2	0	1	1	1	2	68.3	141	1	141
Bactrocera.dorsalis	5	2	0	1	1	0	3	0	20.9	0	20.9
Bactrocera.dorsalis	5	2	0	1	1	0	3	20.9	34	0	34
Bactrocera.dorsalis	5	2	0	2	1	0	3	34	60.7	0	60.7
Bactrocera.dorsalis	5	2	0	2	1	0	3	60.7	75.5	0	75.5
Bactrocera.dorsalis	5	2	0	3	1	0	3	75.5	123.9	0	123.9
Bactrocera.dorsalis	5	2	1	3	1	0	3	123.9	156.1	0	156.1
Bactrocera.dorsalis	5	2	1	3	1	1	3	156.1	164.6	0	164.6
Bactrocera.dorsalis	5	2	1	3	1	1	3	164.6	186.1	0	186.1
Bactrocera.dorsalis	5	2	1	4	1	1	3	186.1	219.4	0	219.4
Bactrocera.dorsalis	5	2	1	4	1	2	3	219.4	221	0	221
Bactrocera.dorsalis	5	2	1	5	1	2	3	221	271.1	0	271.1
Bactrocera.dorsalis	5	2	1	5	1	2	3	271.1	341.6	0	341.6
Bactrocera.dorsalis	5	2	2	5	1	2	3	341.6	412.6	0	412.6
Bactrocera.dorsalis	5	2	2	5	1	2	3	412.6	609.7	0	609.7
Bactrocera.dorsalis	5	2	2	5	1	2	3	609.7	623.3	0	623.3
Bactrocera.dorsalis	5	2	2	5	1	2	3	623.3	1006.8	1	1006.8
Bactrocera.dorsalis	6	0	0	0	1	0	0	0	12.3	0	12.3
Bactrocera.dorsalis	6	0	0	0	1	0	0	12.3	27.2	0	27.2
Bactrocera.dorsalis	6	1	0	0	1	0	0	27.2	68.8	0	68.8
Bactrocera.dorsalis	6	1	0	0	1	1	0	68.8	71.2	0	71.2
Bactrocera.dorsalis	6	1	0	0	1	1	0	71.2	82.5	1	82.5
Bactrocera.dorsalis	6	1	0	0	1	0	1	0	13.8	0	13.8
Bactrocera.dorsalis	6	1	0	0	1	1	1	13.8	119.7	0	119.7
Bactrocera.dorsalis	6	2	0	0	1	1	1	119.7	160.5	0	160.5
Bactrocera.dorsalis	6	2	0	0	1	2	1	160.5	341.5	0	341.5
Bactrocera.dorsalis	6	2	0	0	1	2	1	341.5	358	0	358
Bactrocera.dorsalis	6	3	0	0	1	2	1	358	671	0	671
Bactrocera.dorsalis	6	2	0	0	1	2	1	671	749.5	0	749.5
Bactrocera.dorsalis	6	2	0	0	1	2	1	749.5	755	1	755
Bactrocera.dorsalis	6	2	0	0	1	0	2	0	37.9	0	37.9
Bactrocera.dorsalis	6	2	0	0	1	1	2	37.9	39.1	0	39.1
Bactrocera.dorsalis	6	2	0	0	1	1	2	39.1	152.3	1	152.3
Bactrocera.dorsalis	6	2	0	0	1	0	3	0	20.2	0	20.2
Bactrocera.dorsalis	6	2	0	0	1	0	3	20.2	29.6	0	29.6
Bactrocera.dorsalis	6	2	0	1	1	0	3	29.6	59.6	0	59.6
Bactrocera.dorsalis	6	2	0	1	1	0	3	59.6	61.7	0	61.7
Bactrocera.dorsalis	6	2	0	1	1	1	3	61.7	106	0	106
Bactrocera.dorsalis	6	2	0	1	1	2	3	106	113.7	0	113.7
Bactrocera.dorsalis	6	2	0	1	1	2	3	113.7	122.2	1	122.2
Bactrocera.dorsalis	6	3	0	1	4	0	4	0	10.8	0	10.8
Bactrocera.dorsalis	6	1	0	1	4	0	4	10.8	19	0	19
Bactrocera.dorsalis	6	1	0	2	4	0	4	19	40.4	0	40.4
Bactrocera.dorsalis	6	2	0	2	4	0	4	40.4	47.4	0	47.4
Bactrocera.dorsalis	6	1	0	2	4	0	4	47.4	59.7	0	59.7
Bactrocera.dorsalis	6	1	0	2	4	1	4	59.7	106.2	0	106.2
Bactrocera.dorsalis	6	1	0	2	4	2	4	106.2	107.5	0	107.5
Bactrocera.dorsalis	6	1	0	2	4	2	4	107.5	209.1	1	209.1
Bactrocera.dorsalis	6	1	0	2	4	0	5	0	7.2	0	7.2
Bactrocera.dorsalis	6	1	0	3	4	0	5	7.2	13.2	0	13.2
Bactrocera.dorsalis	6	1	0	3	4	1	5	13.2	23.5	0	23.5
Bactrocera.dorsalis	6	1	0	3	4	2	5	23.5	25	0	25
Bactrocera.dorsalis	6	1	0	3	4	2	5	25	34.2	1	34.2
Bactrocera.dorsalis	6	1	0	3	4	0	6	0	11	0	11
Bactrocera.dorsalis	6	1	0	3	4	0	6	11	40.1	0	40.1
Bactrocera.dorsalis	6	1	0	3	4	1	6	40.1	56.4	0	56.4
Bactrocera.dorsalis	6	1	0	4	4	1	6	56.4	65.4	0	65.4
Bactrocera.dorsalis	6	1	0	4	4	1	6	65.4	99.5	0	99.5
Bactrocera.dorsalis	6	1	0	4	4	2	6	99.5	100.4	0	100.4
Bactrocera.dorsalis	6	1	0	4	4	2	6	100.4	125.4	1	125.4
Bactrocera.dorsalis	6	1	0	4	4	0	7	0	3.4	0	3.4
Bactrocera.dorsalis	6	1	0	5	4	0	7	3.4	10.8	0	10.8
Bactrocera.dorsalis	6	2	0	5	4	0	7	10.8	27.6	0	27.6
Bactrocera.dorsalis	6	2	0	5	4	1	7	27.6	28.6	0	28.6
Bactrocera.dorsalis	6	2	0	5	4	1	7	28.6	43.8	1	43.8
Bactrocera.dorsalis	6	2	0	5	4	0	8	0	8.1	0	8.1
Bactrocera.dorsalis	6	2	0	5	4	0	8	8.1	44.5	0	44.5
Bactrocera.dorsalis	6	2	0	6	4	0	8	44.5	49	0	49
Bactrocera.dorsalis	6	2	0	6	4	1	8	49	52.4	0	52.4
Bactrocera.dorsalis	6	2	0	6	4	1	8	52.4	63	1	63
Bactrocera.dorsalis	7	3	0	0	1	0	0	0	24.9	0	24.9
Bactrocera.dorsalis	7	3	0	0	1	1	0	24.9	47	0	47
Bactrocera.dorsalis	7	3	0	0	1	1	0	47	319.3	1	319.3
Bactrocera.dorsalis	7	3	0	0	1	0	1	0	11.4	0	11.4
Bactrocera.dorsalis	7	1	0	0	1	0	1	11.4	70	0	70
Bactrocera.dorsalis	7	1	0	1	1	0	1	70	130	0	130
Bactrocera.dorsalis	7	1	0	1	1	1	1	130	133	0	133
Bactrocera.dorsalis	7	1	0	1	1	1	1	133	253.3	1	253.3
Bactrocera.dorsalis	7	5	0	1	2	0	2	0	20.2	0	20.2
Bactrocera.dorsalis	7	5	0	2	2	0	2	20.2	86.7	0	86.7
Bactrocera.dorsalis	7	5	0	2	2	1	2	86.7	95.7	0	95.7
Bactrocera.dorsalis	7	5	0	2	2	1	2	95.7	197.7	1	197.7
Bactrocera.dorsalis	7	5	0	2	2	0	3	0	17.4	0	17.4
Bactrocera.dorsalis	7	5	0	2	2	1	3	17.4	24.8	0	24.8
Bactrocera.dorsalis	7	5	0	2	2	1	3	24.8	60.9	1	60.9
Bactrocera.dorsalis	7	5	0	2	2	0	4	0	18.4	0	18.4
Bactrocera.dorsalis	7	5	0	3	2	0	4	18.4	23.4	0	23.4
Bactrocera.dorsalis	7	1	0	3	2	0	4	23.4	74.8	0	74.8
Bactrocera.dorsalis	7	1	0	3	2	0	4	74.8	92.3	0	92.3
Bactrocera.dorsalis	7	1	0	3	2	0	4	92.3	133	0	133
Bactrocera.dorsalis	7	1	0	3	2	1	4	133	142.8	0	142.8
Bactrocera.dorsalis	7	1	0	3	2	1	4	142.8	409.6	1	409.6
Bactrocera.dorsalis	7	1	0	3	2	0	5	0	11.5	0	11.5
Bactrocera.dorsalis	7	1	0	4	2	0	5	11.5	67.2	0	67.2
Bactrocera.dorsalis	7	1	0	4	2	1	5	67.2	87.7	0	87.7
Bactrocera.dorsalis	7	1	0	4	2	1	5	87.7	178.4	1	178.4
Bactrocera.dorsalis	8	0	0	0	0	0	0	0	17.6	0	17.6
Bactrocera.dorsalis	8	0	0	0	0	0	0	17.6	45.3	0	45.3
Bactrocera.dorsalis	8	0	0	1	0	0	0	45.3	158.3	0	158.3
Bactrocera.dorsalis	8	0	0	2	0	0	0	158.3	166	0	166
Bactrocera.dorsalis	8	0	0	2	0	0	0	166	201.3	0	201.3
Bactrocera.dorsalis	8	0	0	3	0	0	0	201.3	239	0	239
Bactrocera.dorsalis	8	0	0	3	0	0	0	239	286.1	0	286.1
Bactrocera.dorsalis	8	0	0	4	0	0	0	286.1	325.8	0	325.8
Bactrocera.dorsalis	8	0	0	5	0	0	0	325.8	366.8	0	366.8
Bactrocera.dorsalis	8	0	0	5	0	1	0	366.8	369.2	0	369.2
Bactrocera.dorsalis	8	0	0	5	0	1	0	369.2	387.5	1	387.5
Bactrocera.dorsalis	8	1	0	5	0	0	1	0	13.7	0	13.7
Bactrocera.dorsalis	8	1	0	5	0	1	1	13.7	68.9	0	68.9
Bactrocera.dorsalis	8	1	0	5	0	1	1	68.9	77.8	0	77.8
Bactrocera.dorsalis	8	1	0	6	0	1	1	77.8	154	0	154
Bactrocera.dorsalis	8	1	0	7	0	1	1	154	198.4	0	198.4
Bactrocera.dorsalis	8	1	0	7	0	1	1	198.4	210	0	210
Bactrocera.dorsalis	8	1	0	8	0	1	1	210	234.8	0	234.8
Bactrocera.dorsalis	8	1	0	9	0	1	1	234.8	298.5	0	298.5
Bactrocera.dorsalis	8	1	0	10	0	1	1	298.5	337.9	0	337.9
Bactrocera.dorsalis	8	0	0	10	0	1	1	337.9	352.3	0	352.3
Bactrocera.dorsalis	8	0	0	11	0	1	1	352.3	380.2	0	380.2
Bactrocera.dorsalis	8	0	0	12	0	1	1	380.2	420.5	0	420.5
Bactrocera.dorsalis	8	0	0	13	0	1	1	420.5	464.3	0	464.3
Bactrocera.dorsalis	8	1	0	13	0	1	1	464.3	472.8	0	472.8
Bactrocera.dorsalis	8	1	0	14	0	1	1	472.8	655	0	655
Bactrocera.dorsalis	8	1	0	15	0	1	1	655	715.3	0	715.3
Bactrocera.dorsalis	8	1	0	16	0	1	1	715.3	738.5	0	738.5
Bactrocera.dorsalis	8	1	0	16	0	1	1	738.5	916.6	0	916.6
Bactrocera.dorsalis	8	1	0	16	0	1	1	916.6	926.9	0	926.9
Bactrocera.dorsalis	8	1	0	17	0	1	1	926.9	1022.8	0	1022.8
Bactrocera.dorsalis	8	1	0	17	0	1	1	1022.8	1077.2	0	1077.2
Bactrocera.dorsalis	8	0	0	17	0	1	1	1077.2	1127.3	0	1127.3
Bactrocera.dorsalis	8	1	0	17	0	1	1	1127.3	1166.1	0	1166.1
Bactrocera.dorsalis	8	1	0	18	0	1	1	1166.1	1176.4	0	1176.4
Bactrocera.dorsalis	8	1	0	19	0	1	1	1176.4	1216.8	0	1216.8
Bactrocera.dorsalis	8	1	0	20	0	1	1	1216.8	1220.9	0	1220.9
Bactrocera.dorsalis	8	1	0	20	0	1	1	1220.9	1241.8	0	1241.8
Bactrocera.dorsalis	8	1	0	20	0	2	1	1241.8	1297.6	0	1297.6
Bactrocera.dorsalis	8	0	0	20	0	2	1	1297.6	1306.8	0	1306.8
Bactrocera.dorsalis	8	0	0	21	0	2	1	1306.8	1320	0	1320
Bactrocera.dorsalis	8	0	0	21	0	2	1	1320	1365.3	0	1365.3
Bactrocera.dorsalis	8	1	0	21	0	2	1	1365.3	1380.1	0	1380.1
Bactrocera.dorsalis	8	1	0	22	0	2	1	1380.1	1387.1	0	1387.1
Bactrocera.dorsalis	8	1	0	22	0	3	1	1387.1	1388.1	0	1388.1
Bactrocera.dorsalis	8	1	0	22	0	3	1	1388.1	1538.3	1	1538.3
Bactrocera.dorsalis	8	2	0	22	0	0	2	0	13.5	0	13.5
Bactrocera.dorsalis	8	2	0	22	0	1	2	13.5	20.7	0	20.7
Bactrocera.dorsalis	8	2	0	22	0	2	2	20.7	64.2	0	64.2
Bactrocera.dorsalis	8	2	0	23	0	2	2	64.2	91.5	0	91.5
Bactrocera.dorsalis	8	2	0	23	0	3	2	91.5	144.9	0	144.9
Bactrocera.dorsalis	8	2	0	24	0	3	2	144.9	164	0	164
Bactrocera.dorsalis	8	2	0	25	0	3	2	164	165.2	0	165.2
Bactrocera.dorsalis	8	0	0	25	0	3	2	165.2	314.1	0	314.1
Bactrocera.dorsalis	8	0	0	26	0	3	2	314.1	324.5	0	324.5
Bactrocera.dorsalis	8	0	0	26	0	3	2	324.5	471.2	0	471.2
Bactrocera.dorsalis	8	0	0	27	0	3	2	471.2	621.6	0	621.6
Bactrocera.dorsalis	8	0	0	28	0	3	2	621.6	671.6	0	671.6
Bactrocera.dorsalis	8	0	0	28	0	3	2	671.6	681.3	0	681.3
Bactrocera.dorsalis	8	0	0	28	0	3	2	681.3	719	1	719
Bactrocera.dorsalis	8	0	0	28	0	0	3	0	55.5	0	55.5
Bactrocera.dorsalis	8	0	0	28	0	1	3	55.5	56.4	0	56.4
Bactrocera.dorsalis	8	0	0	28	0	1	3	56.4	276.8	1	276.8
Bactrocera.dorsalis	8	0	0	28	0	0	4	0	16.5	0	16.5
Bactrocera.dorsalis	8	2	0	28	0	0	4	16.5	29.3	0	29.3
Bactrocera.dorsalis	8	2	0	28	0	1	4	29.3	61.9	0	61.9
Bactrocera.dorsalis	8	1	0	28	0	1	4	61.9	102	0	102
Bactrocera.dorsalis	8	1	0	29	0	1	4	102	173.4	0	173.4
Bactrocera.dorsalis	8	1	0	29	0	1	4	173.4	245.5	1	245.5
Bactrocera.dorsalis	9	0	0	0	0	0	0	0	17.1	0	17.1
Bactrocera.dorsalis	9	0	0	0	0	0	0	17.1	65	0	65
Bactrocera.dorsalis	9	0	0	1	0	0	0	65	70.4	0	70.4
Bactrocera.dorsalis	9	0	0	1	0	0	0	70.4	71.9	0	71.9
Bactrocera.dorsalis	9	1	0	1	0	0	0	71.9	162.3	0	162.3
Bactrocera.dorsalis	9	1	0	2	0	0	0	162.3	223.5	0	223.5
Bactrocera.dorsalis	9	1	0	2	0	0	0	223.5	240.3	0	240.3
Bactrocera.dorsalis	9	1	0	2	0	1	0	240.3	268.9	0	268.9
Bactrocera.dorsalis	9	1	0	3	0	1	0	268.9	322.6	0	322.6
Bactrocera.dorsalis	9	1	0	3	0	1	0	322.6	372.5	0	372.5
Bactrocera.dorsalis	9	1	0	3	0	1	0	372.5	394.3	0	394.3
Bactrocera.dorsalis	9	1	0	4	0	1	0	394.3	421.4	0	421.4
Bactrocera.dorsalis	9	1	0	4	0	1	0	421.4	445.6	0	445.6
Bactrocera.dorsalis	9	1	0	4	0	2	0	445.6	463	0	463
Bactrocera.dorsalis	9	1	0	4	0	2	0	463	509.9	0	509.9
Bactrocera.dorsalis	9	1	0	4	0	3	0	509.9	511.6	0	511.6
Bactrocera.dorsalis	9	1	0	5	0	3	0	511.6	561.6	0	561.6
Bactrocera.dorsalis	9	1	0	5	0	3	0	561.6	695.4	0	695.4
Bactrocera.dorsalis	9	1	0	5	0	3	0	695.4	735.8	0	735.8
Bactrocera.dorsalis	9	1	0	5	0	3	0	735.8	773.8	0	773.8
Bactrocera.dorsalis	9	1	0	5	0	4	0	773.8	774.9	0	774.9
Bactrocera.dorsalis	9	1	0	5	0	4	0	774.9	793.5	1	793.5
Bactrocera.dorsalis	9	1	0	5	0	0	1	0	24.2	0	24.2
Bactrocera.dorsalis	9	1	0	5	0	0	1	24.2	38.4	1	38.4
Bactrocera.dorsalis	9	2	0	5	0	0	2	0	19	0	19
Bactrocera.dorsalis	9	2	0	5	0	1	2	19	21.1	0	21.1
Bactrocera.dorsalis	9	2	0	5	0	1	2	21.1	24.2	0	24.2
Bactrocera.dorsalis	9	2	0	5	0	1	2	24.2	65.4	1	65.4
Bactrocera.dorsalis	9	2	0	5	0	0	3	0	51.9	0	51.9
Bactrocera.dorsalis	9	2	0	6	0	0	3	51.9	90.7	0	90.7
Bactrocera.dorsalis	9	2	0	6	0	1	3	90.7	113.6	0	113.6
Bactrocera.dorsalis	9	2	0	6	0	1	3	113.6	115.9	1	115.9
Bactrocera.dorsalis	9	2	0	6	0	0	4	0	2.1	0	2.1
Bactrocera.dorsalis	9	2	0	7	0	0	4	2.1	72.6	0	72.6
Bactrocera.dorsalis	9	2	0	7	0	0	4	72.6	84.5	0	84.5
Bactrocera.dorsalis	9	2	0	8	0	0	4	84.5	113.8	0	113.8
Bactrocera.dorsalis	9	2	0	8	0	1	4	113.8	163.8	0	163.8
Bactrocera.dorsalis	9	1	0	8	0	1	4	163.8	206.4	0	206.4
Bactrocera.dorsalis	9	1	0	9	0	1	4	206.4	220.7	0	220.7
Bactrocera.dorsalis	9	1	0	9	0	1	4	220.7	277.5	0	277.5
Bactrocera.dorsalis	9	1	0	9	0	2	4	277.5	278.9	0	278.9
Bactrocera.dorsalis	9	1	0	9	0	2	4	278.9	475.3	1	475.3
Bactrocera.dorsalis	10	0	0	0	0	0	0	0	16.6	0	16.6
Bactrocera.dorsalis	10	1	0	0	0	0	0	16.6	26.3	0	26.3
Bactrocera.dorsalis	10	1	0	1	0	0	0	26.3	55.1	0	55.1
Bactrocera.dorsalis	10	1	0	1	0	0	0	55.1	234	0	234
Bactrocera.dorsalis	10	1	0	2	0	0	0	234	273.6	0	273.6
Bactrocera.dorsalis	10	1	0	2	0	0	0	273.6	326.6	0	326.6
Bactrocera.dorsalis	10	1	0	2	0	0	0	326.6	339.1	1	339.1
Bactrocera.dorsalis	10	1	0	2	0	0	1	0	70.8	0	70.8
Bactrocera.dorsalis	10	1	0	2	0	0	1	70.8	79.4	0	79.4
Bactrocera.dorsalis	10	1	0	3	0	0	1	79.4	208.6	0	208.6
Bactrocera.dorsalis	10	1	0	3	0	0	1	208.6	216	0	216
Bactrocera.dorsalis	10	1	0	3	0	0	1	216	271	0	271
Bactrocera.dorsalis	10	1	0	3	0	0	1	271	299.2	0	299.2
Bactrocera.dorsalis	10	1	0	4	0	0	1	299.2	412.3	0	412.3
Bactrocera.dorsalis	10	1	0	4	0	0	1	412.3	416.9	0	416.9
Bactrocera.dorsalis	10	1	0	5	0	0	1	416.9	434.5	0	434.5
Bactrocera.dorsalis	10	1	0	5	0	0	1	434.5	446.3	0	446.3
Bactrocera.dorsalis	10	1	0	5	0	0	1	446.3	620.5	0	620.5
Bactrocera.dorsalis	10	1	0	6	0	0	1	620.5	626.3	0	626.3
Bactrocera.dorsalis	10	1	0	6	0	0	1	626.3	645.6	0	645.6
Bactrocera.dorsalis	10	1	0	6	0	0	1	645.6	678.2	0	678.2
Bactrocera.dorsalis	10	1	0	7	0	0	1	678.2	701.7	0	701.7
Bactrocera.dorsalis	10	1	0	7	0	0	1	701.7	736.1	0	736.1
Bactrocera.dorsalis	10	1	0	7	0	1	1	736.1	736.8	0	736.8
Bactrocera.dorsalis	10	1	0	7	0	1	1	736.8	861.1	1	861.1
Bactrocera.dorsalis	10	1	0	7	0	0	2	0	105.7	0	105.7
Bactrocera.dorsalis	10	1	0	8	0	0	2	105.7	205.2	0	205.2
Bactrocera.dorsalis	10	1	0	8	0	0	2	205.2	213.3	0	213.3
Bactrocera.dorsalis	10	1	0	8	0	1	2	213.3	214	0	214
Bactrocera.dorsalis	10	1	0	8	0	1	2	214	258.6	1	258.6
Bactrocera.dorsalis	10	1	0	8	0	0	3	0	67.3	0	67.3
Bactrocera.dorsalis	10	1	0	9	0	0	3	67.3	216.9	0	216.9
Bactrocera.dorsalis	10	1	0	9	0	0	3	216.9	432.2	0	432.2
Bactrocera.dorsalis	10	1	0	10	0	0	3	432.2	449.3	0	449.3
Bactrocera.dorsalis	10	1	0	10	0	0	3	449.3	496.1	0	496.1
Bactrocera.dorsalis	10	1	0	11	0	0	3	496.1	499.1	0	499.1
Bactrocera.dorsalis	11	1	0	0	0	0	0	0	9.2	0	9.2
Bactrocera.dorsalis	11	1	0	0	0	0	0	9.2	14.3	0	14.3
Bactrocera.dorsalis	11	1	0	1	0	0	0	14.3	85.8	0	85.8
Bactrocera.dorsalis	11	1	0	1	0	0	0	85.8	94.4	0	94.4
Bactrocera.dorsalis	11	1	0	1	0	0	0	94.4	111.7	0	111.7
Bactrocera.dorsalis	11	1	0	2	0	0	0	111.7	166.1	0	166.1
Bactrocera.dorsalis	11	1	0	2	0	0	0	166.1	226.7	0	226.7
Bactrocera.dorsalis	11	1	0	2	0	0	0	226.7	243.9	0	243.9
Bactrocera.dorsalis	11	1	0	3	0	0	0	243.9	268.2	0	268.2
Bactrocera.dorsalis	11	1	0	3	0	0	0	268.2	305.5	0	305.5
Bactrocera.dorsalis	11	1	0	3	0	0	0	305.5	434.9	0	434.9
Bactrocera.dorsalis	11	1	0	3	0	0	0	434.9	527.2	0	527.2
Bactrocera.dorsalis	11	1	0	3	0	0	0	527.2	703.5	0	703.5
Bactrocera.dorsalis	11	1	0	4	0	0	0	703.5	774.7	0	774.7
Bactrocera.dorsalis	11	1	0	4	0	0	0	774.7	780.4	0	780.4
Bactrocera.dorsalis	11	1	0	4	0	0	0	780.4	956	0	956
Bactrocera.dorsalis	11	1	0	5	0	0	0	956	1043.1	0	1043.1
Bactrocera.dorsalis	11	1	0	5	0	0	0	1043.1	1113.9	0	1113.9
Bactrocera.dorsalis	11	1	0	6	0	0	0	1113.9	1163.5	0	1163.5
Bactrocera.dorsalis	11	1	0	6	0	0	0	1163.5	1275.1	0	1275.1
Bactrocera.dorsalis	11	1	0	7	0	0	0	1275.1	1483.5	0	1483.5
Bactrocera.dorsalis	11	1	0	7	0	0	0	1483.5	1531.5	0	1531.5
Bactrocera.dorsalis	11	3	0	7	0	0	0	1531.5	1544.5	0	1544.5
Bactrocera.dorsalis	11	3	0	7	0	0	0	1544.5	1556.7	0	1556.7
Bactrocera.dorsalis	11	3	0	8	0	0	0	1556.7	1561.1	0	1561.1
Bactrocera.dorsalis	11	3	0	8	0	1	0	1561.1	1562.5	0	1562.5
Bactrocera.dorsalis	11	3	0	8	0	1	0	1562.5	2029.5	1	2029.5
Bactrocera.dorsalis	12	0	0	0	1	0	0	0	78.6	0	78.6
Bactrocera.dorsalis	12	1	0	1	1	0	0	78.6	89.8	0	89.8
Bactrocera.dorsalis	12	1	0	1	1	0	0	89.8	160.1	0	160.1
Bactrocera.dorsalis	12	1	0	1	1	0	0	160.1	276	0	276
Bactrocera.dorsalis	12	1	0	2	1	0	0	276	388.3	0	388.3
Bactrocera.dorsalis	12	1	0	2	1	0	0	388.3	556.1	0	556.1
Bactrocera.dorsalis	12	1	0	3	1	0	0	556.1	766.5	0	766.5
Bactrocera.dorsalis	12	1	0	3	1	0	0	766.5	842.4	0	842.4
Bactrocera.dorsalis	12	1	0	4	1	0	0	842.4	844.9	0	844.9
Bactrocera.dorsalis	12	1	0	4	1	0	0	844.9	957.3	0	957.3
Bactrocera.dorsalis	12	0	0	4	1	0	0	957.3	970.9	0	970.9
Bactrocera.dorsalis	12	0	0	4	1	0	0	970.9	1003.5	1	1003.5
Bactrocera.dorsalis	12	1	0	4	1	0	1	0	60.5	0	60.5
Bactrocera.dorsalis	12	1	0	4	1	1	1	60.5	91.1	0	91.1
Bactrocera.dorsalis	12	3	0	4	1	1	1	91.1	212.7	0	212.7
Bactrocera.dorsalis	12	3	0	4	1	1	1	212.7	237	0	237
Bactrocera.dorsalis	12	3	0	4	1	0	2	237	263.2	0	263.2
Bactrocera.dorsalis	12	4	0	4	1	0	2	263.2	429	0	429
Bactrocera.dorsalis	12	3	0	4	1	0	2	429	465.7	0	465.7
Bactrocera.dorsalis	12	3	0	5	1	0	2	465.7	530.3	0	530.3
Bactrocera.dorsalis	12	3	0	5	1	1	2	530.3	562.9	0	562.9
Bactrocera.dorsalis	12	6	0	5	1	1	2	562.9	655.3	0	655.3
Bactrocera.dorsalis	12	6	0	5	1	1	2	655.3	698.4	1	698.4
Bactrocera.dorsalis	13	3	0	0	0	0	0	0	27.2	0	27.2
Bactrocera.dorsalis	13	3	0	0	0	0	0	27.2	73.3	0	73.3
Bactrocera.dorsalis	13	3	0	0	0	1	0	73.3	1918.1	1	1918.1
Bactrocera.dorsalis	14	0	0	0	0	0	0	0	22.4	0	22.4
Bactrocera.dorsalis	14	0	0	0	0	0	0	22.4	217.6	1	217.6
Bactrocera.dorsalis	14	3	0	0	1	0	1	0	16.7	0	16.7
Bactrocera.dorsalis	14	3	0	0	1	1	1	16.7	18.2	0	18.2
Bactrocera.dorsalis	14	3	0	0	1	1	1	18.2	47.4	1	47.4
Bactrocera.dorsalis	14	4	0	0	3	0	2	0	74.8	0	74.8
Bactrocera.dorsalis	14	5	0	0	3	0	2	74.8	243.9	0	243.9
Bactrocera.dorsalis	14	5	0	0	3	1	2	243.9	268.7	0	268.7
Bactrocera.dorsalis	14	5	0	1	3	1	2	268.7	304	0	304
Bactrocera.dorsalis	14	5	0	1	3	1	2	304	356.6	0	356.6
Bactrocera.dorsalis	14	5	0	2	3	1	2	356.6	420.6	0	420.6
Bactrocera.dorsalis	14	5	0	2	3	2	2	420.6	445	0	445
Bactrocera.dorsalis	14	5	0	2	3	2	2	445	479.2	0	479.2
Bactrocera.dorsalis	14	5	0	3	3	2	2	479.2	540.6	0	540.6
Bactrocera.dorsalis	14	7	0	3	3	2	2	540.6	574.4	0	574.4
Bactrocera.dorsalis	14	7	0	3	3	3	2	574.4	581.6	0	581.6
Bactrocera.dorsalis	14	7	0	3	3	3	2	581.6	638.4	1	638.4
Bactrocera.dorsalis	14	7	0	3	3	0	3	0	33.7	0	33.7
Bactrocera.dorsalis	14	7	0	3	3	1	3	33.7	67	0	67
Bactrocera.dorsalis	14	7	0	3	3	2	3	67	69.6	0	69.6
Bactrocera.dorsalis	14	7	0	3	3	2	3	69.6	87.7	1	87.7
Bactrocera.dorsalis	15	0	0	0	0	0	0	0	35.5	0	35.5
Bactrocera.dorsalis	15	1	0	0	0	1	0	35.5	57.2	0	57.2
Bactrocera.dorsalis	15	1	0	1	0	1	0	57.2	110.8	0	110.8
Bactrocera.dorsalis	15	0	0	1	0	1	0	110.8	190.6	0	190.6
Bactrocera.dorsalis	15	0	0	2	0	1	0	190.6	203.8	0	203.8
Bactrocera.dorsalis	15	1	0	2	0	2	0	203.8	228.8	0	228.8
Bactrocera.dorsalis	15	0	0	3	0	2	0	228.8	240.6	0	240.6
Bactrocera.dorsalis	15	0	0	3	0	2	0	240.6	260.6	0	260.6
Bactrocera.dorsalis	15	0	0	3	0	2	0	260.6	298.8	0	298.8
Bactrocera.dorsalis	15	0	0	4	0	2	0	298.8	327.6	0	327.6
Bactrocera.dorsalis	15	0	0	4	0	2	0	327.6	363.1	0	363.1
Bactrocera.dorsalis	15	1	0	5	0	2	0	363.1	375.2	0	375.2
Bactrocera.dorsalis	15	1	0	5	0	3	0	375.2	378.2	0	378.2
Bactrocera.dorsalis	15	1	0	5	0	3	0	378.2	388	1	388
Bactrocera.dorsalis	15	1	0	5	0	0	0	0	12.2	0	12.2
Bactrocera.dorsalis	15	1	0	5	0	1	0	12.2	14.7	0	14.7
Bactrocera.dorsalis	15	1	0	5	0	1	0	14.7	75.7	1	75.7
Bactrocera.dorsalis	15	1	0	5	1	0	1	0	13.6	0	13.6
Bactrocera.dorsalis	15	1	0	6	1	0	1	13.6	126.4	0	126.4
Bactrocera.dorsalis	15	1	0	6	1	0	1	126.4	146	0	146
Bactrocera.dorsalis	15	1	0	7	1	0	1	146	148.9	0	148.9
Bactrocera.dorsalis	15	1	0	7	1	0	1	148.9	180.1	0	180.1
Bactrocera.dorsalis	15	0	0	8	1	0	1	180.1	222.7	0	222.7
Bactrocera.dorsalis	15	0	0	8	1	0	1	222.7	232.9	0	232.9
Bactrocera.dorsalis	15	0	0	8	1	0	1	232.9	272.7	0	272.7
Bactrocera.dorsalis	15	1	0	8	1	1	1	272.7	273.7	0	273.7
Bactrocera.dorsalis	15	1	0	9	1	1	1	273.7	279.4	0	279.4
Bactrocera.dorsalis	15	1	0	9	1	1	1	279.4	288.8	0	288.8
Bactrocera.dorsalis	15	1	0	9	1	1	1	288.8	363.5	0	363.5
Bactrocera.dorsalis	15	1	0	9	1	2	1	363.5	366.4	0	366.4
Bactrocera.dorsalis	15	1	0	9	1	2	1	366.4	387.4	1	387.4
Bactrocera.dorsalis	15	1	0	9	1	0	2	0	6.5	0	6.5
Bactrocera.dorsalis	15	2	0	9	1	0	2	6.5	20.4	0	20.4
Bactrocera.dorsalis	15	2	0	9	1	1	2	20.4	62.8	0	62.8
Bactrocera.dorsalis	15	0	0	10	1	1	2	62.8	67.7	0	67.7
Bactrocera.dorsalis	15	0	0	10	1	1	2	67.7	107.8	0	107.8
Bactrocera.dorsalis	15	0	0	10	1	1	2	107.8	170.8	0	170.8
Bactrocera.dorsalis	15	0	0	11	1	1	2	170.8	174.6	0	174.6
Bactrocera.dorsalis	15	0	0	11	1	1	2	174.6	197	0	197
Bactrocera.dorsalis	15	0	0	11	1	1	2	197	213.7	0	213.7
Bactrocera.dorsalis	15	0	0	11	1	1	2	213.7	220.7	0	220.7
Bactrocera.dorsalis	15	0	0	12	1	1	2	220.7	270.4	0	270.4
Bactrocera.dorsalis	15	1	0	12	1	1	2	270.4	335.4	0	335.4
Bactrocera.dorsalis	15	1	0	12	1	1	2	335.4	344.3	0	344.3
Bactrocera.dorsalis	15	1	0	12	1	1	2	344.3	372.2	0	372.2
Bactrocera.dorsalis	15	1	0	12	1	1	2	372.2	379.8	0	379.8
Bactrocera.dorsalis	15	1	0	13	1	1	2	379.8	429.3	0	429.3
Bactrocera.dorsalis	15	1	0	13	1	2	2	429.3	430	0	430
Bactrocera.dorsalis	15	1	0	13	1	2	2	430	490	1	490
Bactrocera.dorsalis	15	1	0	13	1	0	2	0	4.5	0	4.5
Bactrocera.dorsalis	15	1	0	13	1	1	2	4.5	5.2	0	5.2
Bactrocera.dorsalis	15	1	0	13	1	1	2	5.2	40.3	1	40.3
Bactrocera.dorsalis	15	1	0	13	4	0	3	0	27.4	0	27.4
Bactrocera.dorsalis	15	0	0	13	4	0	3	27.4	142.6	1	142.6
Bactrocera.dorsalis	16	0	0	0	1	0	0	0	8	0	8
Bactrocera.dorsalis	16	1	0	0	1	0	0	8	550.6	1	550.6
Bactrocera.dorsalis	16	1	0	0	2	0	1	0	377	0	377
Bactrocera.dorsalis	16	1	0	0	2	1	1	377	389.3	0	389.3
Bactrocera.dorsalis	16	0	0	1	2	1	1	389.3	473.4	0	473.4
Bactrocera.dorsalis	16	0	1	1	2	1	1	473.4	547.3	0	547.3
Bactrocera.dorsalis	16	0	1	1	2	1	1	547.3	587.8	0	587.8
Bactrocera.dorsalis	16	0	1	2	2	1	1	587.8	602.6	0	602.6
Bactrocera.dorsalis	16	0	1	2	2	1	1	602.6	649.6	0	649.6
Bactrocera.dorsalis	16	0	1	2	2	1	1	649.6	660	1	660
Bactrocera.dorsalis	16	0	1	2	4	0	2	0	58.4	0	58.4
Bactrocera.dorsalis	16	0	1	2	4	0	2	58.4	81.7	1	81.7
Bactrocera.dorsalis	16	0	1	2	4	0	3	0	194.7	0	194.7
Bactrocera.dorsalis	16	0	1	2	4	0	3	194.7	323.2	1	323.2
Bactrocera.dorsalis	16	0	1	2	6	0	4	0	66.7	0	66.7
Bactrocera.dorsalis	16	0	1	3	6	0	4	66.7	162.1	0	162.1
Bactrocera.dorsalis	16	0	1	3	6	0	4	162.1	174.4	0	174.4
Bactrocera.dorsalis	16	0	1	4	6	0	4	174.4	211	0	211
Bactrocera.dorsalis	16	0	1	4	6	0	4	211	227.5	0	227.5
Bactrocera.dorsalis	16	0	1	5	6	0	4	227.5	317.1	0	317.1
Bactrocera.dorsalis	16	0	2	5	6	0	4	317.1	408.9	0	408.9
Bactrocera.dorsalis	16	0	2	5	6	0	4	408.9	429.1	0	429.1
Bactrocera.dorsalis	16	0	2	6	6	0	4	429.1	470.1	0	470.1
Bactrocera.dorsalis	16	0	2	6	6	0	4	470.1	474.3	0	474.3
Bactrocera.dorsalis	16	0	2	7	6	0	4	474.3	496.6	0	496.6
Bactrocera.dorsalis	16	0	2	7	6	0	4	496.6	510.8	0	510.8
Bactrocera.dorsalis	16	0	2	8	6	0	4	510.8	529.1	0	529.1
Bactrocera.dorsalis	16	0	3	8	6	0	4	529.1	567.8	0	567.8
Bactrocera.dorsalis	16	0	3	8	6	0	4	567.8	649	0	649
Bactrocera.dorsalis	16	0	3	9	6	0	4	649	908.8	0	908.8
Bactrocera.dorsalis	16	0	3	9	6	0	4	908.8	918.7	0	918.7
Bactrocera.dorsalis	16	0	3	10	6	0	4	918.7	1010.2	0	1010.2
Bactrocera.dorsalis	16	0	3	10	6	0	4	1010.2	1011.4	0	1011.4
Bactrocera.dorsalis	16	0	3	10	6	0	4	1011.4	1021.4	1	1021.4
Bactrocera.dorsalis	16	0	3	10	6	0	5	0	165.9	0	165.9
Bactrocera.dorsalis	16	0	3	10	6	0	5	165.9	253.1	1	253.1
Bactrocera.dorsalis	17	0	0	0	0	0	0	0	4.6	0	4.6
Bactrocera.dorsalis	17	0	0	0	0	0	0	4.6	135.3	0	135.3
Bactrocera.dorsalis	17	0	0	0	0	0	0	135.3	141.3	0	141.3
Bactrocera.dorsalis	17	1	0	1	0	0	0	141.3	215	0	215
Bactrocera.dorsalis	17	1	0	1	0	0	0	215	217.6	0	217.6
Bactrocera.dorsalis	17	1	0	1	0	0	0	217.6	293.2	0	293.2
Bactrocera.dorsalis	17	0	0	2	0	0	0	293.2	322.1	0	322.1
Bactrocera.dorsalis	17	0	0	2	0	0	0	322.1	365.5	0	365.5
Bactrocera.dorsalis	17	0	0	3	0	0	0	365.5	379.5	0	379.5
Bactrocera.dorsalis	17	1	0	3	0	0	0	379.5	436.1	0	436.1
Bactrocera.dorsalis	17	0	0	3	0	0	0	436.1	446.6	0	446.6
Bactrocera.dorsalis	17	0	0	4	0	0	0	446.6	525.4	0	525.4
Bactrocera.dorsalis	17	0	1	4	0	0	0	525.4	578.7	0	578.7
Bactrocera.dorsalis	17	0	1	4	0	0	0	578.7	643.7	0	643.7
Bactrocera.dorsalis	17	1	1	4	0	0	0	643.7	660.1	0	660.1
Bactrocera.dorsalis	17	1	1	5	0	0	0	660.1	792.9	0	792.9
Bactrocera.dorsalis	17	1	2	5	0	0	0	792.9	871.3	0	871.3
Bactrocera.dorsalis	17	1	2	5	0	0	0	871.3	876.9	0	876.9
Bactrocera.dorsalis	17	1	2	5	0	0	0	876.9	936.1	0	936.1
Bactrocera.dorsalis	17	1	2	6	0	0	0	936.1	1025.4	0	1025.4
Bactrocera.dorsalis	17	0	3	6	0	0	0	1025.4	1051.2	0	1051.2
Bactrocera.dorsalis	17	0	3	6	0	0	0	1051.2	1153.6	0	1153.6
Bactrocera.dorsalis	17	0	3	6	0	0	0	1153.6	1174.5	0	1174.5
Bactrocera.dorsalis	17	1	3	6	0	0	0	1174.5	1177.8	0	1177.8
Bactrocera.dorsalis	17	0	3	7	0	0	0	1177.8	1309	0	1309
Bactrocera.dorsalis	17	0	4	7	0	0	0	1309	1546.5	0	1546.5
Bactrocera.dorsalis	17	0	4	7	0	0	0	1546.5	1594.4	0	1594.4
Bactrocera.dorsalis	17	0	4	8	0	0	0	1594.4	1660.4	0	1660.4
Bactrocera.dorsalis	17	0	4	8	0	0	0	1660.4	1803.9	0	1803.9
Bactrocera.dorsalis	18	0	0	0	0	0	0	0	19.5	0	19.5
Bactrocera.dorsalis	18	1	0	0	0	0	0	19.5	24.9	0	24.9
Bactrocera.dorsalis	18	1	0	0	0	0	0	24.9	34.4	0	34.4
Bactrocera.dorsalis	18	1	0	0	0	0	0	34.4	35.1	0	35.1
Bactrocera.dorsalis	18	1	0	0	0	1	0	35.1	36.5	0	36.5
Bactrocera.dorsalis	18	1	0	0	0	1	0	36.5	143.7	1	143.7
Bactrocera.dorsalis	18	3	0	0	2	0	1	0	37.2	0	37.2
Bactrocera.dorsalis	18	3	0	0	2	0	1	37.2	39	0	39
Bactrocera.dorsalis	18	3	0	0	2	1	1	39	44	0	44
Bactrocera.dorsalis	18	3	0	0	2	1	1	44	92.1	1	92.1
Bactrocera.dorsalis	18	1	0	0	4	0	2	0	11.6	0	11.6
Bactrocera.dorsalis	18	3	0	0	4	0	2	11.6	31.7	0	31.7
Bactrocera.dorsalis	18	3	0	0	4	0	2	31.7	33.4	0	33.4
Bactrocera.dorsalis	18	3	0	0	4	1	2	33.4	34.6	0	34.6
Bactrocera.dorsalis	18	3	0	0	4	1	2	34.6	46.9	1	46.9
Bactrocera.dorsalis	18	4	0	0	4	0	3	0	8.4	0	8.4
Bactrocera.dorsalis	18	4	0	0	4	0	3	8.4	9	0	9
Bactrocera.dorsalis	18	4	0	0	4	1	3	9	10.2	0	10.2
Bactrocera.dorsalis	18	4	0	0	4	1	3	10.2	63.1	1	63.1
Bactrocera.dorsalis	18	5	0	0	6	0	4	0	7.3	0	7.3
Bactrocera.dorsalis	18	5	0	1	6	0	4	7.3	43.8	0	43.8
Bactrocera.dorsalis	18	5	0	2	6	0	4	43.8	60.2	0	60.2
Bactrocera.dorsalis	18	1	0	2	6	0	4	60.2	72.2	0	72.2
Bactrocera.dorsalis	18	1	0	3	6	0	4	72.2	81.7	0	81.7
Bactrocera.dorsalis	18	5	0	3	6	0	4	81.7	93.7	0	93.7
Bactrocera.dorsalis	18	5	0	3	6	0	4	93.7	95.6	0	95.6
Bactrocera.dorsalis	18	5	0	3	6	1	4	95.6	98.2	0	98.2
Bactrocera.dorsalis	18	5	0	3	6	1	4	98.2	129.6	1	129.6
Bactrocera.dorsalis	18	1	0	3	6	0	5	0	15.4	0	15.4
Bactrocera.dorsalis	18	1	0	3	6	0	5	15.4	24.8	0	24.8
Bactrocera.dorsalis	18	1	0	4	6	0	5	24.8	57.9	0	57.9
Bactrocera.dorsalis	18	1	0	4	6	0	5	57.9	60	0	60
Bactrocera.dorsalis	18	1	0	4	6	1	5	60	63	0	63
Bactrocera.dorsalis	18	1	0	4	6	1	5	63	74.7	1	74.7
Bactrocera.dorsalis	18	3	0	4	6	0	6	0	11.6	0	11.6
Bactrocera.dorsalis	18	3	0	4	6	0	6	11.6	14.3	0	14.3
Bactrocera.dorsalis	18	3	0	4	6	0	6	14.3	34.3	0	34.3
Bactrocera.dorsalis	18	2	0	4	6	0	6	34.3	39	0	39
Bactrocera.dorsalis	18	2	0	5	6	0	6	39	67.9	0	67.9
Bactrocera.dorsalis	18	2	0	5	6	0	6	67.9	70.5	0	70.5
Bactrocera.dorsalis	18	2	0	5	6	1	6	70.5	71.8	0	71.8
Bactrocera.dorsalis	18	2	0	5	6	1	6	71.8	118.7	1	118.7
Bactrocera.dorsalis	19	0	0	0	0	0	0	0	4	0	4
Bactrocera.dorsalis	19	1	0	0	0	0	0	4	8	0	8
Bactrocera.dorsalis	19	1	0	0	0	0	0	8	52.4	0	52.4
Bactrocera.dorsalis	19	1	0	1	0	0	0	52.4	311.2	0	311.2
Bactrocera.dorsalis	19	1	0	2	0	0	0	311.2	318.6	0	318.6
Bactrocera.dorsalis	19	0	0	2	0	0	0	318.6	378	0	378
Bactrocera.dorsalis	19	0	0	2	0	0	0	378	404.3	0	404.3
Bactrocera.dorsalis	19	1	0	2	0	0	0	404.3	412.3	0	412.3
Bactrocera.dorsalis	19	1	0	3	0	0	0	412.3	467.5	0	467.5
Bactrocera.dorsalis	19	0	0	3	0	0	0	467.5	477.1	0	477.1
Bactrocera.dorsalis	19	0	0	3	0	0	0	477.1	509.3	0	509.3
Bactrocera.dorsalis	19	0	0	3	0	0	0	509.3	515.7	0	515.7
Bactrocera.dorsalis	19	0	0	4	0	0	0	515.7	651.6	0	651.6
Bactrocera.dorsalis	19	0	0	4	0	0	0	651.6	656.8	0	656.8
Bactrocera.dorsalis	19	0	0	4	0	0	0	656.8	678	0	678
Bactrocera.dorsalis	19	1	0	4	0	0	0	678	744.1	0	744.1
Bactrocera.dorsalis	19	1	0	4	0	0	0	744.1	753.8	0	753.8
Bactrocera.dorsalis	19	1	0	4	0	0	0	753.8	754.9	0	754.9
Bactrocera.dorsalis	19	1	0	4	0	1	0	754.9	757.1	0	757.1
Bactrocera.dorsalis	19	1	0	4	0	1	0	757.1	772.4	1	772.4
Bactrocera.dorsalis	19	0	0	4	1	0	1	0	2	0	2
Bactrocera.dorsalis	19	1	0	4	1	0	1	2	10.2	0	10.2
Bactrocera.dorsalis	19	1	0	5	1	0	1	10.2	15.8	0	15.8
Bactrocera.dorsalis	19	1	0	5	1	1	1	15.8	25.8	0	25.8
Bactrocera.dorsalis	19	0	0	5	1	1	1	25.8	28	0	28
Bactrocera.dorsalis	19	0	0	6	1	1	1	28	85.7	0	85.7
Bactrocera.dorsalis	19	1	0	6	1	1	1	85.7	118.3	0	118.3
Bactrocera.dorsalis	19	1	0	7	1	1	1	118.3	305.4	0	305.4
Bactrocera.dorsalis	19	0	0	7	1	1	1	305.4	318.1	0	318.1
Bactrocera.dorsalis	19	0	0	7	1	1	1	318.1	417.1	0	417.1
Bactrocera.dorsalis	19	0	0	7	1	1	1	417.1	434.1	0	434.1
Bactrocera.dorsalis	19	0	0	7	1	1	1	434.1	502.1	0	502.1
Bactrocera.dorsalis	19	0	0	8	1	1	1	502.1	527.9	0	527.9
Bactrocera.dorsalis	19	1	0	8	1	1	1	527.9	536.9	0	536.9
Bactrocera.dorsalis	19	0	0	8	1	1	1	536.9	547.2	0	547.2
Bactrocera.dorsalis	19	1	0	8	1	1	1	547.2	552.9	0	552.9
Bactrocera.dorsalis	19	1	0	8	1	1	1	552.9	561.3	0	561.3
Bactrocera.dorsalis	19	0	0	8	1	1	1	561.3	583	0	583
Bactrocera.dorsalis	19	0	0	9	1	1	1	583	650.3	0	650.3
Bactrocera.dorsalis	19	0	0	9	1	1	1	650.3	652.6	0	652.6
Bactrocera.dorsalis	19	0	0	9	1	2	1	652.6	653.2	0	653.2
Bactrocera.dorsalis	19	1	0	9	1	2	1	653.2	657.7	0	657.7
Bactrocera.dorsalis	19	1	0	9	1	2	1	657.7	698.2	1	698.2
Bactrocera.dorsalis	19	1	0	9	1	0	2	0	96.2	0	96.2
Bactrocera.dorsalis	19	1	0	10	1	0	2	96.2	106.5	0	106.5
Bactrocera.dorsalis	19	0	0	10	1	0	2	106.5	146.3	0	146.3
Bactrocera.dorsalis	19	0	0	10	1	0	2	146.3	195.8	0	195.8
Bactrocera.dorsalis	19	0	0	11	1	0	2	195.8	290.5	0	290.5
Bactrocera.dorsalis	19	0	0	11	1	0	2	290.5	319.5	0	319.5
Bactrocera.dorsalis	19	1	0	11	1	0	2	319.5	329.1	0	329.1
Bactrocera.dorsalis	19	0	0	11	1	0	2	329.1	360.3	0	360.3
Bactrocera.dorsalis	19	0	0	12	1	0	2	360.3	414	0	414
Bactrocera.dorsalis	19	1	0	12	1	0	2	414	422	0	422
Bactrocera.dorsalis	19	1	0	12	1	0	2	422	436.7	0	436.7
Bactrocera.dorsalis	19	1	0	13	1	0	2	436.7	439.8	0	439.8
Bactrocera.dorsalis	19	1	0	13	1	0	2	439.8	481.7	0	481.7
Bactrocera.dorsalis	19	1	0	13	1	1	2	481.7	490.9	0	490.9
Bactrocera.dorsalis	20	0	0	0	6	0	0	0	35.1	0	35.1
Bactrocera.dorsalis	20	1	0	0	6	0	0	35.1	43.5	0	43.5
Bactrocera.dorsalis	20	1	0	0	6	0	0	43.5	44.5	0	44.5
Bactrocera.dorsalis	20	1	0	0	6	1	0	44.5	46.3	0	46.3
Bactrocera.dorsalis	20	1	0	0	6	1	0	46.3	152.6	1	152.6
Bactrocera.dorsalis	20	1	0	0	6	0	1	0	5.2	0	5.2
Bactrocera.dorsalis	20	0	0	0	6	0	1	5.2	83.5	0	83.5
Bactrocera.dorsalis	20	0	0	1	6	0	1	83.5	199.3	0	199.3
Bactrocera.dorsalis	20	0	0	1	6	0	1	199.3	326.9	0	326.9
Bactrocera.dorsalis	20	0	0	2	6	0	1	326.9	339	0	339
Bactrocera.dorsalis	20	0	0	2	6	0	1	339	383.4	0	383.4
Bactrocera.dorsalis	20	0	0	3	6	0	1	383.4	439.7	0	439.7
Bactrocera.dorsalis	20	0	0	3	6	0	1	439.7	685.8	0	685.8
Bactrocera.dorsalis	20	0	0	4	6	0	1	685.8	754.8	0	754.8
Bactrocera.dorsalis	20	1	0	4	6	0	1	754.8	849.5	0	849.5
Bactrocera.dorsalis	20	1	0	4	6	1	1	849.5	860.8	0	860.8
Bactrocera.dorsalis	20	0	0	4	6	1	1	860.8	869.8	0	869.8
Bactrocera.dorsalis	20	0	0	4	6	1	1	869.8	948.7	1	948.7
Bactrocera.dorsalis	21	0	0	0	0	0	0	0	0.7	0	0.7
Bactrocera.dorsalis	21	0	0	0	0	0	0	0.7	57	0	57
Bactrocera.dorsalis	21	0	0	1	0	0	0	57	150.4	0	150.4
Bactrocera.dorsalis	21	0	0	1	0	0	0	150.4	157.4	0	157.4
Bactrocera.dorsalis	21	1	0	1	0	0	0	157.4	174.8	0	174.8
Bactrocera.dorsalis	21	1	0	2	0	0	0	174.8	185.2	0	185.2
Bactrocera.dorsalis	21	1	0	2	0	0	0	185.2	188.1	0	188.1
Bactrocera.dorsalis	21	0	0	2	0	0	0	188.1	244.3	0	244.3
Bactrocera.dorsalis	21	0	0	3	0	0	0	244.3	280	0	280
Bactrocera.dorsalis	21	0	0	3	0	0	0	280	326	0	326
Bactrocera.dorsalis	21	0	0	4	0	0	0	326	350.7	0	350.7
Bactrocera.dorsalis	21	1	0	4	0	0	0	350.7	371.5	0	371.5
Bactrocera.dorsalis	21	1	0	4	0	0	0	371.5	382	0	382
Bactrocera.dorsalis	21	0	0	4	0	0	0	382	403.2	0	403.2
Bactrocera.dorsalis	21	0	0	5	0	0	0	403.2	419.7	0	419.7
Bactrocera.dorsalis	21	0	0	5	0	0	0	419.7	452.6	0	452.6
Bactrocera.dorsalis	21	0	0	6	0	0	0	452.6	478.9	0	478.9
Bactrocera.dorsalis	21	1	0	6	0	0	0	478.9	484.6	0	484.6
Bactrocera.dorsalis	21	1	0	6	0	0	0	484.6	531.9	0	531.9
Bactrocera.dorsalis	21	0	0	6	0	0	0	531.9	577.8	0	577.8
Bactrocera.dorsalis	21	0	0	7	0	0	0	577.8	605.2	0	605.2
Bactrocera.dorsalis	21	1	0	7	0	0	0	605.2	611.1	0	611.1
Bactrocera.dorsalis	21	1	0	7	0	1	0	611.1	654.9	0	654.9
Bactrocera.dorsalis	21	1	0	8	0	1	0	654.9	666.5	0	666.5
Bactrocera.dorsalis	21	1	0	8	0	1	0	666.5	668.2	0	668.2
Bactrocera.dorsalis	21	1	0	8	0	1	0	668.2	750.7	0	750.7
Bactrocera.dorsalis	21	1	0	8	0	1	0	750.7	763.7	0	763.7
Bactrocera.dorsalis	21	2	0	8	0	1	0	763.7	774.8	0	774.8
Bactrocera.dorsalis	21	1	0	8	0	1	0	774.8	788.7	0	788.7
Bactrocera.dorsalis	21	1	0	8	0	1	0	788.7	791.3	0	791.3
Bactrocera.dorsalis	21	1	0	8	0	2	0	791.3	792	0	792
Bactrocera.dorsalis	21	1	0	8	0	2	0	792	808.3	1	808.3
Bactrocera.dorsalis	21	1	0	8	0	0	1	0	10.3	0	10.3
Bactrocera.dorsalis	21	0	0	8	0	0	1	10.3	38.1	0	38.1
Bactrocera.dorsalis	21	0	0	9	0	0	1	38.1	79.8	0	79.8
Bactrocera.dorsalis	21	0	0	9	0	0	1	79.8	87.4	0	87.4
Bactrocera.dorsalis	21	0	0	9	0	0	1	87.4	166.9	1	166.9
Bactrocera.dorsalis	21	0	0	9	0	0	2	0	52.1	0	52.1
Bactrocera.dorsalis	21	1	0	9	0	0	2	52.1	63.9	0	63.9
Bactrocera.dorsalis	21	2	0	9	0	0	2	63.9	131.3	0	131.3
Bactrocera.dorsalis	21	2	0	10	0	0	2	131.3	291.8	0	291.8
Bactrocera.dorsalis	21	2	0	10	0	0	2	291.8	329.4	0	329.4
Bactrocera.dorsalis	21	1	0	10	0	0	2	329.4	353.8	0	353.8
Bactrocera.dorsalis	21	1	0	10	0	0	2	353.8	357.2	1	357.2
Bactrocera.dorsalis	21	0	0	10	0	0	3	0	62.6	0	62.6
Bactrocera.dorsalis	21	0	0	11	0	0	3	62.6	97	0	97
Bactrocera.dorsalis	21	0	0	11	0	0	3	97	161.9	0	161.9
Bactrocera.dorsalis	21	0	0	11	0	0	3	161.9	197.7	0	197.7
Bactrocera.dorsalis	21	0	0	11	0	0	3	197.7	306.7	0	306.7
Bactrocera.dorsalis	21	0	0	11	0	0	3	306.7	400	0	400
Bactrocera.dorsalis	21	0	0	11	0	0	3	400	463.2	0	463.2
Bactrocera.dorsalis	21	0	0	11	0	0	3	463.2	469.3	1	469.3
Bactrocera.dorsalis	22	0	0	0	0	0	0	0	119.3	0	119.3
Bactrocera.dorsalis	22	0	0	0	0	0	0	119.3	125.6	1	125.6
Bactrocera.dorsalis	22	0	0	0	1	0	1	0	12.5	0	12.5
Bactrocera.dorsalis	22	0	0	0	1	0	1	12.5	41.2	1	41.2
Bactrocera.dorsalis	22	0	0	0	2	0	2	0	7.9	0	7.9
Bactrocera.dorsalis	22	1	0	0	2	0	2	7.9	15.4	0	15.4
Bactrocera.dorsalis	22	1	0	0	2	1	2	15.4	78.2	0	78.2
Bactrocera.dorsalis	22	1	0	0	2	1	2	78.2	81.6	1	81.6
Bactrocera.dorsalis	22	1	0	0	2	0	3	0	62.7	0	62.7
Bactrocera.dorsalis	22	0	0	0	2	0	3	62.7	137.7	0	137.7
Bactrocera.dorsalis	22	0	0	1	2	0	3	137.7	161.8	0	161.8
Bactrocera.dorsalis	22	1	0	1	2	0	3	161.8	166.1	0	166.1
Bactrocera.dorsalis	22	2	0	1	2	0	3	166.1	179.6	0	179.6
Bactrocera.dorsalis	22	3	0	1	2	0	3	179.6	189.3	0	189.3
Bactrocera.dorsalis	22	3	0	1	2	0	3	189.3	208.3	0	208.3
Bactrocera.dorsalis	22	3	0	1	2	0	3	208.3	252.7	1	252.7
Bactrocera.dorsalis	22	1	0	1	3	0	4	0	6.2	0	6.2
Bactrocera.dorsalis	22	1	0	1	3	0	4	6.2	8	0	8
Bactrocera.dorsalis	22	1	0	1	3	1	4	8	10.1	0	10.1
Bactrocera.dorsalis	22	1	0	1	3	1	4	10.1	44.2	1	44.2
Bactrocera.dorsalis	22	1	0	1	3	0	5	0	2.4	0	2.4
Bactrocera.dorsalis	22	1	0	1	3	0	5	2.4	4.4	0	4.4
Bactrocera.dorsalis	22	1	0	1	3	1	5	4.4	5.6	0	5.6
Bactrocera.dorsalis	22	1	0	1	3	1	5	5.6	49.9	1	49.9
Bactrocera.dorsalis	22	1	0	1	3	0	6	0	2.3	0	2.3
Bactrocera.dorsalis	22	1	0	1	3	0	6	2.3	5.1	0	5.1
Bactrocera.dorsalis	22	1	0	1	3	1	6	5.1	6.5	0	6.5
Bactrocera.dorsalis	22	1	0	1	3	1	6	6.5	13.7	1	13.7
Bactrocera.dorsalis	22	1	0	1	4	0	7	0	19.9	0	19.9
Bactrocera.dorsalis	22	1	0	1	4	0	7	19.9	21.4	0	21.4
Bactrocera.dorsalis	22	1	0	1	4	1	7	21.4	22.4	0	22.4
Bactrocera.dorsalis	22	1	0	1	4	1	7	22.4	75.9	1	75.9
Bactrocera.dorsalis	22	1	0	1	4	0	8	0	21.1	0	21.1
Bactrocera.dorsalis	22	1	0	1	4	1	8	21.1	23.1	0	23.1
Bactrocera.dorsalis	22	1	0	1	4	1	8	23.1	54.1	1	54.1
Bactrocera.dorsalis	22	1	0	1	6	0	9	0	12	0	12
Bactrocera.dorsalis	22	0	0	1	6	0	9	12	47.4	0	47.4
Bactrocera.dorsalis	22	0	0	2	6	0	9	47.4	75.3	0	75.3
Bactrocera.dorsalis	22	1	0	2	6	0	9	75.3	76.7	0	76.7
Bactrocera.dorsalis	22	1	0	2	6	0	9	76.7	78.3	0	78.3
Bactrocera.dorsalis	22	1	0	2	6	1	9	78.3	79.3	0	79.3
Bactrocera.dorsalis	22	1	0	2	6	1	9	79.3	86	1	86
Bactrocera.dorsalis	22	1	0	2	7	0	10	0	10.3	0	10.3
Bactrocera.dorsalis	22	1	0	3	7	0	10	10.3	33.9	0	33.9
Bactrocera.dorsalis	22	1	0	4	7	0	10	33.9	40.2	0	40.2
Bactrocera.dorsalis	22	0	0	4	7	0	10	40.2	49.7	0	49.7
Bactrocera.dorsalis	22	0	0	4	7	0	10	49.7	106.5	0	106.5
Bactrocera.dorsalis	22	0	0	5	7	0	10	106.5	133.8	0	133.8
Bactrocera.dorsalis	22	1	0	5	7	0	10	133.8	142.1	0	142.1
Bactrocera.dorsalis	22	1	0	5	7	0	10	142.1	144.3	0	144.3
Bactrocera.dorsalis	22	1	0	5	7	1	10	144.3	150.7	0	150.7
Bactrocera.dorsalis	22	1	0	5	7	1	10	150.7	173.3	1	173.3
Bactrocera.dorsalis	22	1	0	5	7	0	11	0	128.6	0	128.6
Bactrocera.dorsalis	22	1	0	5	7	0	11	128.6	130	0	130
Bactrocera.dorsalis	22	1	0	5	7	1	11	130	131.3	0	131.3
Bactrocera.dorsalis	22	1	0	5	7	1	11	131.3	305.6	1	305.6
Bactrocera.dorsalis	23	0	0	0	0	0	0	0	105.9	0	105.9
Bactrocera.dorsalis	23	0	0	1	0	0	0	105.9	188.3	0	188.3
Bactrocera.dorsalis	23	0	0	1	0	0	0	188.3	201.9	0	201.9
Bactrocera.dorsalis	23	0	0	2	0	0	0	201.9	235.5	0	235.5
Bactrocera.dorsalis	23	0	0	2	0	0	0	235.5	246.7	0	246.7
Bactrocera.dorsalis	23	0	0	3	0	0	0	246.7	288.2	0	288.2
Bactrocera.dorsalis	23	0	0	3	0	0	0	288.2	461.2	0	461.2
Bactrocera.dorsalis	23	0	0	4	0	0	0	461.2	511.5	0	511.5
Bactrocera.dorsalis	23	0	0	4	0	0	0	511.5	586.7	0	586.7
Bactrocera.dorsalis	23	1	0	4	0	0	0	586.7	603.5	0	603.5
Bactrocera.dorsalis	23	1	0	4	0	1	0	603.5	604.3	0	604.3
Bactrocera.dorsalis	23	1	0	4	0	1	0	604.3	844.4	1	844.4
Bactrocera.dorsalis	23	1	0	4	0	0	1	0	79.5	0	79.5
Bactrocera.dorsalis	23	1	0	5	0	0	1	79.5	97.6	0	97.6
Bactrocera.dorsalis	23	0	0	5	0	0	1	97.6	102.1	0	102.1
Bactrocera.dorsalis	23	0	0	5	0	0	1	102.1	108.3	0	108.3
Bactrocera.dorsalis	23	0	0	5	0	0	1	108.3	118.2	1	118.2
Bactrocera.dorsalis	23	1	0	5	0	0	2	0	24.7	0	24.7
Bactrocera.dorsalis	23	1	0	6	0	0	2	24.7	31.9	0	31.9
Bactrocera.dorsalis	23	0	0	6	0	0	2	31.9	38.5	0	38.5
Bactrocera.dorsalis	23	1	0	6	0	0	2	38.5	46.4	0	46.4
Bactrocera.dorsalis	23	1	0	6	0	1	2	46.4	47.1	0	47.1
Bactrocera.dorsalis	23	1	0	6	0	1	2	47.1	56.2	1	56.2
Bactrocera.dorsalis	23	0	0	6	0	0	3	0	73.9	0	73.9
Bactrocera.dorsalis	23	0	0	7	0	0	3	73.9	100.4	0	100.4
Bactrocera.dorsalis	23	0	0	7	0	0	3	100.4	130.9	0	130.9
Bactrocera.dorsalis	23	0	0	8	0	0	3	130.9	136	0	136
Bactrocera.dorsalis	23	0	0	8	0	0	3	136	160.2	0	160.2
Bactrocera.dorsalis	23	1	0	8	0	0	3	160.2	165.4	0	165.4
Bactrocera.dorsalis	23	1	0	9	0	0	3	165.4	198.8	0	198.8
Bactrocera.dorsalis	23	1	0	9	0	0	3	198.8	253.2	0	253.2
Bactrocera.dorsalis	23	1	0	10	0	0	3	253.2	262.7	0	262.7
Bactrocera.dorsalis	23	0	0	10	0	0	3	262.7	281.4	0	281.4
Bactrocera.dorsalis	23	0	0	10	0	0	3	281.4	288.1	0	288.1
Bactrocera.dorsalis	23	1	0	10	0	0	3	288.1	314.2	0	314.2
Bactrocera.dorsalis	23	2	0	10	0	0	3	314.2	341.3	0	341.3
Bactrocera.dorsalis	23	2	0	10	0	0	3	341.3	378.6	1	378.6
Bactrocera.dorsalis	23	2	0	10	0	0	4	0	32.9	0	32.9
Bactrocera.dorsalis	23	2	0	11	0	0	4	32.9	39.3	0	39.3
Bactrocera.dorsalis	23	2	0	11	0	0	4	39.3	53.6	0	53.6
Bactrocera.dorsalis	23	2	0	12	0	0	4	53.6	147.5	0	147.5
Bactrocera.dorsalis	23	5	0	12	0	0	4	147.5	186.8	0	186.8
Bactrocera.dorsalis	23	3	0	12	0	0	4	186.8	235.3	0	235.3
Bactrocera.dorsalis	23	2	0	12	0	0	4	235.3	255.6	0	255.6
Bactrocera.dorsalis	23	2	0	12	0	1	4	255.6	256.3	0	256.3
Bactrocera.dorsalis	23	2	0	12	0	1	4	256.3	279	1	279
Bactrocera.dorsalis	23	2	0	12	0	0	5	0	16.6	0	16.6
Bactrocera.dorsalis	23	2	0	12	0	0	5	16.6	49.4	1	49.4
Bactrocera.dorsalis	24	0	0	0	0	0	0	0	2.1	0	2.1
Bactrocera.dorsalis	24	0	0	0	0	0	0	2.1	47.4	0	47.4
Bactrocera.dorsalis	24	0	0	1	0	0	0	47.4	65	0	65
Bactrocera.dorsalis	24	1	0	1	0	0	0	65	72.7	0	72.7
Bactrocera.dorsalis	24	1	0	1	0	0	0	72.7	110.2	0	110.2
Bactrocera.dorsalis	24	0	0	1	0	0	0	110.2	157.3	0	157.3
Bactrocera.dorsalis	24	1	0	1	0	0	0	157.3	180.7	0	180.7
Bactrocera.dorsalis	24	1	0	1	0	1	0	180.7	182.3	0	182.3
Bactrocera.dorsalis	24	1	0	1	0	1	0	182.3	220.2	1	220.2
Bactrocera.dorsalis	24	0	0	1	0	0	1	0	33.5	0	33.5
Bactrocera.dorsalis	24	0	0	2	0	0	1	33.5	66.3	0	66.3
Bactrocera.dorsalis	24	0	0	2	0	0	1	66.3	119.1	0	119.1
Bactrocera.dorsalis	24	0	0	3	0	0	1	119.1	189.8	0	189.8
Bactrocera.dorsalis	24	0	0	3	0	0	1	189.8	309	0	309
Bactrocera.dorsalis	24	0	0	4	0	0	1	309	328.5	0	328.5
Bactrocera.dorsalis	24	1	0	4	0	0	1	328.5	330.9	0	330.9
Bactrocera.dorsalis	24	1	0	4	0	1	1	330.9	367.6	0	367.6
Bactrocera.dorsalis	24	1	0	4	0	2	1	367.6	369.2	0	369.2
Bactrocera.dorsalis	24	1	0	4	0	2	1	369.2	379.2	1	379.2
Bactrocera.dorsalis	24	1	0	4	0	0	2	0	4.2	0	4.2
Bactrocera.dorsalis	24	0	0	4	0	0	2	4.2	45	0	45
Bactrocera.dorsalis	24	0	0	5	0	0	2	45	61.8	0	61.8
Bactrocera.dorsalis	24	0	0	5	0	0	2	61.8	81.3	0	81.3
Bactrocera.dorsalis	24	1	0	5	0	0	2	81.3	109.1	0	109.1
Bactrocera.dorsalis	24	0	0	5	0	0	2	109.1	173.3	0	173.3
Bactrocera.dorsalis	24	1	0	5	0	0	2	173.3	200.1	0	200.1
Bactrocera.dorsalis	24	0	0	5	0	0	2	200.1	202.2	0	202.2
Bactrocera.dorsalis	24	0	0	6	0	0	2	202.2	204.6	0	204.6
Bactrocera.dorsalis	24	0	0	6	0	0	2	204.6	234.6	0	234.6
Bactrocera.dorsalis	24	0	0	7	0	0	2	234.6	303.6	0	303.6
Bactrocera.dorsalis	24	0	0	7	0	0	2	303.6	328.2	0	328.2
Bactrocera.dorsalis	24	0	0	8	0	0	2	328.2	341.1	0	341.1
Bactrocera.dorsalis	24	0	0	8	0	0	2	341.1	603.3	0	603.3
Bactrocera.dorsalis	24	0	0	9	0	0	2	603.3	608.3	0	608.3
Bactrocera.dorsalis	24	1	0	9	0	0	2	608.3	613.3	0	613.3
Bactrocera.dorsalis	24	1	0	9	0	1	2	613.3	618.3	0	618.3
Bactrocera.dorsalis	24	0	0	9	0	1	2	618.3	713.6	0	713.6
Bactrocera.dorsalis	24	2	0	9	0	1	2	713.6	716.2	0	716.2
Bactrocera.dorsalis	24	2	0	9	0	2	2	716.2	733.8	0	733.8
Bactrocera.dorsalis	24	0	0	9	0	2	2	733.8	754.7	0	754.7
Bactrocera.dorsalis	24	1	0	9	0	2	2	754.7	763.4	0	763.4
Bactrocera.dorsalis	24	1	0	9	0	3	2	763.4	780.6	0	780.6
Bactrocera.dorsalis	24	0	0	9	0	3	2	780.6	786	0	786
Bactrocera.dorsalis	24	0	0	10	0	3	2	786	829.5	0	829.5
Bactrocera.dorsalis	24	1	0	10	0	3	2	829.5	831.8	0	831.8
Bactrocera.dorsalis	24	1	0	10	0	4	2	831.8	880.8	0	880.8
Bactrocera.dorsalis	24	1	0	11	0	4	2	880.8	938.3	0	938.3
Bactrocera.dorsalis	24	0	0	11	0	4	2	938.3	942.1	0	942.1
Bactrocera.dorsalis	24	1	0	11	0	4	2	942.1	949.9	0	949.9
Bactrocera.dorsalis	24	1	0	11	0	5	2	949.9	1078.6	0	1078.6
Bactrocera.dorsalis	25	0	0	0	0	0	0	0	32.5	0	32.5
Bactrocera.dorsalis	25	0	0	1	0	0	0	32.5	47.2	0	47.2
Bactrocera.dorsalis	25	0	0	1	0	0	0	47.2	198.1	0	198.1
Bactrocera.dorsalis	25	0	0	2	0	0	0	198.1	320.6	0	320.6
Bactrocera.dorsalis	25	0	0	2	0	0	0	320.6	428.7	0	428.7
Bactrocera.dorsalis	25	1	0	2	0	0	0	428.7	534.6	0	534.6
Bactrocera.dorsalis	25	1	0	3	0	0	0	534.6	602.8	0	602.8
Bactrocera.dorsalis	25	1	0	3	0	0	0	602.8	608.7	0	608.7
Bactrocera.dorsalis	25	0	0	3	0	0	0	608.7	707.1	0	707.1
Bactrocera.dorsalis	25	1	0	3	0	0	0	707.1	720.1	0	720.1
Bactrocera.dorsalis	25	1	0	4	0	0	0	720.1	822.4	0	822.4
Bactrocera.dorsalis	25	1	0	4	0	1	0	822.4	823.2	0	823.2
Bactrocera.dorsalis	25	1	0	4	0	1	0	823.2	859.6	1	859.6
Bactrocera.dorsalis	25	1	0	4	0	0	1	0	42.4	0	42.4
Bactrocera.dorsalis	25	0	0	4	0	0	1	42.4	165.2	0	165.2
Bactrocera.dorsalis	25	0	0	5	0	0	1	165.2	172.2	0	172.2
Bactrocera.dorsalis	25	2	0	5	0	0	1	172.2	273.3	0	273.3
Bactrocera.dorsalis	25	2	0	5	0	1	1	273.3	276.8	0	276.8
Bactrocera.dorsalis	25	2	0	5	0	1	1	276.8	411.2	1	411.2
Bactrocera.dorsalis	25	2	0	5	0	0	2	0	138.5	0	138.5
Bactrocera.dorsalis	25	2	0	6	0	0	2	138.5	146.3	0	146.3
Bactrocera.dorsalis	25	2	0	6	0	1	2	146.3	147.1	0	147.1
Bactrocera.dorsalis	25	2	0	6	0	1	2	147.1	213.9	1	213.9
Bactrocera.dorsalis	25	2	0	6	0	0	3	0	83.8	0	83.8
Bactrocera.dorsalis	25	2	0	6	0	0	3	83.8	157.2	1	157.2
Bactrocera.dorsalis	26	0	0	0	0	0	0	0	1.6	0	1.6
Bactrocera.dorsalis	26	0	0	0	0	0	0	1.6	3	0	3
Bactrocera.dorsalis	26	1	0	0	0	0	0	3	4.4	0	4.4
Bactrocera.dorsalis	26	1	0	0	0	0	0	4.4	124.4	0	124.4
Bactrocera.dorsalis	26	1	0	0	0	0	0	124.4	126	0	126
Bactrocera.dorsalis	26	1	0	0	0	1	0	126	136.7	0	136.7
Bactrocera.dorsalis	26	1	0	0	0	1	0	136.7	162.1	0	162.1
Bactrocera.dorsalis	26	1	0	1	0	1	0	162.1	178.6	0	178.6
Bactrocera.dorsalis	26	0	0	1	0	1	0	178.6	217.7	0	217.7
Bactrocera.dorsalis	26	0	0	1	0	1	0	217.7	241.1	0	241.1
Bactrocera.dorsalis	26	1	0	1	0	1	0	241.1	244.4	0	244.4
Bactrocera.dorsalis	26	1	0	1	0	2	0	244.4	251.6	0	251.6
Bactrocera.dorsalis	26	0	0	1	0	2	0	251.6	255.6	0	255.6
Bactrocera.dorsalis	26	0	0	2	0	2	0	255.6	294.5	0	294.5
Bactrocera.dorsalis	26	0	0	2	0	2	0	294.5	295.9	0	295.9
Bactrocera.dorsalis	26	0	0	2	0	2	0	295.9	414.8	0	414.8
Bactrocera.dorsalis	26	1	0	2	0	2	0	414.8	456.3	0	456.3
Bactrocera.dorsalis	26	1	0	3	0	2	0	456.3	464.9	0	464.9
Bactrocera.dorsalis	26	0	0	3	0	2	0	464.9	472.9	0	472.9
Bactrocera.dorsalis	26	1	0	3	0	2	0	472.9	474.2	0	474.2
Bactrocera.dorsalis	26	1	0	3	0	3	0	474.2	477.7	0	477.7
Bactrocera.dorsalis	26	1	0	3	0	3	0	477.7	483.5	0	483.5
Bactrocera.dorsalis	26	0	0	3	0	3	0	483.5	503.7	0	503.7
Bactrocera.dorsalis	26	1	0	3	0	3	0	503.7	515	0	515
Bactrocera.dorsalis	26	0	0	3	0	3	0	515	600.3	0	600.3
Bactrocera.dorsalis	26	0	0	3	0	3	0	600.3	603.7	0	603.7
Bactrocera.dorsalis	26	0	0	4	0	3	0	603.7	623.8	0	623.8
Bactrocera.dorsalis	26	0	0	4	0	3	0	623.8	626.1	0	626.1
Bactrocera.dorsalis	26	0	0	4	0	3	0	626.1	654.9	0	654.9
Bactrocera.dorsalis	26	0	0	5	0	3	0	654.9	665.4	0	665.4
Bactrocera.dorsalis	26	0	0	5	0	3	0	665.4	669.8	0	669.8
Bactrocera.dorsalis	26	0	0	6	0	3	0	669.8	698.4	0	698.4
Bactrocera.dorsalis	26	0	0	6	0	3	0	698.4	724.9	0	724.9
Bactrocera.dorsalis	26	0	0	6	0	3	0	724.9	944.1	0	944.1
Bactrocera.dorsalis	26	0	0	7	0	3	0	944.1	997.2	0	997.2
Bactrocera.dorsalis	26	0	0	7	0	3	0	997.2	1070.9	0	1070.9
Bactrocera.dorsalis	26	1	0	7	0	3	0	1070.9	1081.6	0	1081.6
Bactrocera.dorsalis	26	1	0	7	0	3	0	1081.6	1155.5	0	1155.5
Bactrocera.dorsalis	26	0	0	7	0	3	0	1155.5	1226.1	0	1226.1
Bactrocera.dorsalis	26	0	0	8	0	3	0	1226.1	1228.5	0	1228.5
Bactrocera.dorsalis	26	0	0	8	0	3	0	1228.5	1273.9	0	1273.9
Bactrocera.dorsalis	26	1	0	8	0	3	0	1273.9	1287.6	0	1287.6
Bactrocera.dorsalis	26	0	0	8	0	3	0	1287.6	1290.3	0	1290.3
Bactrocera.dorsalis	26	0	0	8	0	3	0	1290.3	1299.4	0	1299.4
Bactrocera.dorsalis	26	0	0	8	0	3	0	1299.4	1439	0	1439
Bactrocera.dorsalis	26	1	0	8	0	3	0	1439	1490.1	0	1490.1
Bactrocera.dorsalis	26	1	0	9	0	3	0	1490.1	1535.9	0	1535.9
Bactrocera.dorsalis	26	1	0	9	0	3	0	1535.9	1539	0	1539
Bactrocera.dorsalis	26	1	0	9	0	4	0	1539	1557.6	0	1557.6
Bactrocera.dorsalis	26	1	0	9	0	4	0	1557.6	1559.8	0	1559.8
Bactrocera.dorsalis	26	1	0	9	0	5	0	1559.8	1560.9	0	1560.9
Bactrocera.dorsalis	26	1	0	9	0	5	0	1560.9	1586.3	1	1586.3
Bactrocera.dorsalis	26	1	0	0	0	0	1	0	20.5	0	20.5
Bactrocera.dorsalis	26	1	0	1	0	0	1	20.5	67.8	0	67.8
Bactrocera.dorsalis	26	1	0	1	0	0	1	67.8	89	0	89
Bactrocera.dorsalis	26	1	0	2	0	0	1	89	122.2	0	122.2
Bactrocera.dorsalis	26	1	0	2	0	0	1	122.2	145.8	0	145.8
Bactrocera.dorsalis	26	1	0	2	0	0	1	145.8	147.3	0	147.3
Bactrocera.dorsalis	26	1	0	2	0	1	1	147.3	181.9	0	181.9
Bactrocera.dorsalis	26	1	0	2	0	1	1	181.9	242.4	0	242.4
Bactrocera.dorsalis	26	1	0	3	0	1	1	242.4	250.2	0	250.2
Bactrocera.dorsalis	26	1	0	3	0	1	1	250.2	251.7	0	251.7
Bactrocera.dorsalis	26	1	0	3	0	2	1	251.7	256.5	0	256.5
Bactrocera.dorsalis	27	1	0	0	4	0	0	0	18.2	0	18.2
Bactrocera.dorsalis	27	1	0	0	4	0	0	18.2	19.9	0	19.9
Bactrocera.dorsalis	27	1	0	0	4	1	0	19.9	21	0	21
Bactrocera.dorsalis	27	1	0	0	4	1	0	21	31.9	1	31.9
Bactrocera.dorsalis	27	0	0	0	7	0	1	0	15.2	0	15.2
Bactrocera.dorsalis	27	0	0	0	7	0	1	15.2	26.2	0	26.2
Bactrocera.dorsalis	27	0	0	0	7	0	1	26.2	47.6	0	47.6
Bactrocera.dorsalis	27	0	0	0	7	0	1	47.6	49.1	0	49.1
Bactrocera.dorsalis	27	1	0	0	7	1	1	49.1	119.2	0	119.2
Bactrocera.dorsalis	27	1	0	0	7	1	1	119.2	120.5	0	120.5
Bactrocera.dorsalis	27	1	0	0	7	2	1	120.5	121.5	0	121.5
Bactrocera.dorsalis	27	1	0	0	7	2	1	121.5	127.3	1	127.3
Bactrocera.dorsalis	27	0	0	0	9	0	2	0	29.6	0	29.6
Bactrocera.dorsalis	27	1	0	0	9	0	2	29.6	73.7	0	73.7
Bactrocera.dorsalis	27	0	0	0	9	0	2	73.7	87.6	0	87.6
Bactrocera.dorsalis	27	0	0	0	9	0	2	87.6	112.8	0	112.8
Bactrocera.dorsalis	27	0	0	0	9	0	2	112.8	153.8	0	153.8
Bactrocera.dorsalis	27	0	0	1	9	0	2	153.8	175.2	0	175.2
Bactrocera.dorsalis	27	0	0	1	9	0	2	175.2	202.6	0	202.6
Bactrocera.dorsalis	27	0	0	1	9	0	2	202.6	216.6	0	216.6
Bactrocera.dorsalis	27	0	0	2	9	0	2	216.6	217.9	0	217.9
Bactrocera.dorsalis	27	0	0	2	9	0	2	217.9	261.5	0	261.5
Bactrocera.dorsalis	27	0	0	2	9	0	2	261.5	262.6	0	262.6
Bactrocera.dorsalis	27	0	0	2	9	0	2	262.6	275.4	0	275.4
Bactrocera.dorsalis	27	0	0	3	9	0	2	275.4	291.6	0	291.6
Bactrocera.dorsalis	27	0	0	3	9	0	2	291.6	302	0	302
Bactrocera.dorsalis	27	0	0	3	9	0	2	302	361.8	0	361.8
Bactrocera.dorsalis	27	0	0	4	9	0	2	361.8	421	0	421
Bactrocera.dorsalis	27	0	0	4	9	0	2	421	434.9	0	434.9
Bactrocera.dorsalis	27	0	0	4	9	0	2	434.9	463.6	0	463.6
Bactrocera.dorsalis	27	0	0	5	9	0	2	463.6	476.3	0	476.3
Bactrocera.dorsalis	27	0	0	5	9	0	2	476.3	513.5	0	513.5
Bactrocera.dorsalis	27	0	0	6	9	0	2	513.5	521.5	0	521.5
Bactrocera.dorsalis	27	0	0	6	9	0	2	521.5	523	0	523
Bactrocera.dorsalis	27	0	0	6	9	0	2	523	528.4	0	528.4
Bactrocera.dorsalis	27	0	0	7	9	0	2	528.4	548	0	548
Bactrocera.dorsalis	27	0	0	7	9	0	2	548	581.3	0	581.3
Bactrocera.dorsalis	27	0	0	8	9	0	2	581.3	592.8	0	592.8
Bactrocera.dorsalis	27	0	0	8	9	0	2	592.8	613.7	0	613.7
Bactrocera.dorsalis	27	0	0	9	9	0	2	613.7	623.8	0	623.8
Bactrocera.dorsalis	27	0	0	9	9	0	2	623.8	643.4	0	643.4
Bactrocera.dorsalis	27	0	0	9	9	0	2	643.4	690.4	0	690.4
Bactrocera.dorsalis	27	0	0	10	9	0	2	690.4	723.3	0	723.3
Bactrocera.dorsalis	27	0	0	10	9	0	2	723.3	753.8	0	753.8
Bactrocera.dorsalis	27	1	0	10	9	0	2	753.8	762.4	0	762.4
Bactrocera.dorsalis	27	1	0	10	9	0	2	762.4	766.6	0	766.6
Bactrocera.dorsalis	27	1	0	10	9	1	2	766.6	785	0	785
Bactrocera.dorsalis	28	0	0	0	0	0	0	0	1	0	0
Bactrocera.dorsalis	28	0	0	0	0	0	0	1	68.1	0	1
Bactrocera.dorsalis	28	0	0	0	0	0	0	68.1	97.2	0	68.1
Bactrocera.dorsalis	28	0	0	0	0	0	0	97.2	100.9	1	97.2
Bactrocera.dorsalis	28	0	0	0	0	0	1	0	56.9	0	0
Bactrocera.dorsalis	28	1	0	0	0	0	1	56.9	72.9	0	56.9
Bactrocera.dorsalis	28	1	0	0	0	0	1	72.9	74.4	0	72.9
Bactrocera.dorsalis	28	1	0	0	0	1	1	74.4	75.1	0	74.4
Bactrocera.dorsalis	28	1	0	0	0	1	1	75.1	83.8	1	75.1
Bactrocera.dorsalis	28	1	0	0	1	0	2	0	9.2	0	0
Bactrocera.dorsalis	28	1	0	0	1	0	2	9.2	41.3	0	9.2
Bactrocera.dorsalis	28	1	0	0	1	0	2	41.3	79.8	0	41.3
Bactrocera.dorsalis	28	0	0	0	1	0	2	79.8	102.7	0	79.8
Bactrocera.dorsalis	28	0	0	0	1	0	2	102.7	155.7	0	102.7
Bactrocera.dorsalis	28	0	0	1	1	0	2	155.7	181	0	155.7
Bactrocera.dorsalis	28	0	0	1	1	0	2	181	197.7	0	181
Bactrocera.dorsalis	28	1	0	1	1	0	2	197.7	202.3	0	197.7
Bactrocera.dorsalis	28	1	0	1	1	0	2	202.3	209.5	0	202.3
Bactrocera.dorsalis	28	1	0	1	1	0	2	209.5	210.9	0	209.5
Bactrocera.dorsalis	28	1	0	1	1	1	2	210.9	211.8	0	210.9
Bactrocera.dorsalis	28	1	0	1	1	1	2	211.8	219	1	211.8
Bactrocera.dorsalis	28	0	0	1	2	0	3	0	26.2	0	0
Bactrocera.dorsalis	28	1	0	1	2	0	3	26.2	30.9	0	26.2
Bactrocera.dorsalis	28	1	0	1	2	0	3	30.9	32.7	0	30.9
Bactrocera.dorsalis	28	1	0	1	2	0	3	32.7	34.1	0	32.7
Bactrocera.dorsalis	28	1	0	1	2	0	3	34.1	42.9	1	34.1
Ceratitis.cosyra	1	0	0	0	0	0	0	0	3.7	0	3.7
Ceratitis.cosyra	1	0	0	0	0	0	0	3.7	8.4	0	8.4
Ceratitis.cosyra	1	0	0	0	0	0	0	8.4	196.4	1	196.4
Ceratitis.cosyra	1	0	0	0	0	0	1	0	1.2	0	1.2
Ceratitis.cosyra	1	0	0	0	0	0	1	1.2	30.8	1	30.8
Ceratitis.cosyra	1	0	0	0	2	0	2	0	53.9	0	53.9
Ceratitis.cosyra	1	0	0	0	2	0	2	53.9	406.4	0	406.4
Ceratitis.cosyra	1	0	0	1	2	0	2	406.4	449.4	0	449.4
Ceratitis.cosyra	1	0	0	1	2	0	2	449.4	537.6	0	537.6
Ceratitis.cosyra	1	0	0	2	2	0	2	537.6	665.5	0	665.5
Ceratitis.cosyra	1	0	0	2	2	0	2	665.5	819.6	0	819.6
Ceratitis.cosyra	1	0	0	3	2	0	2	819.6	997.3	0	997.3
Ceratitis.cosyra	1	0	1	3	2	0	2	997.3	1360.3	0	1360.3
Ceratitis.cosyra	1	0	1	3	2	0	2	1360.3	1512.8	0	1512.8
Ceratitis.cosyra	1	1	1	3	2	0	2	1512.8	1520.8	0	1520.8
Ceratitis.cosyra	2	3	0	0	0	0	0	0	77	0	77
Ceratitis.cosyra	2	3	0	0	0	0	0	77	78.5	0	78.5
Ceratitis.cosyra	2	3	0	0	0	1	0	78.5	79.3	0	79.3
Ceratitis.cosyra	2	3	0	0	0	1	0	79.3	84	1	84
Ceratitis.cosyra	2	3	0	0	0	0	1	0	5.1	0	5.1
Ceratitis.cosyra	2	4	0	0	0	0	1	5.1	47.8	0	47.8
Ceratitis.cosyra	2	4	0	1	0	0	1	47.8	49.1	0	49.1
Ceratitis.cosyra	2	2	0	1	0	0	1	49.1	101.4	0	101.4
Ceratitis.cosyra	2	2	0	1	0	0	1	101.4	102.2	0	102.2
Ceratitis.cosyra	2	2	0	1	0	0	1	102.2	103.8	0	103.8
Ceratitis.cosyra	2	2	0	1	0	1	1	103.8	104.7	0	104.7
Ceratitis.cosyra	2	2	0	1	0	1	1	104.7	108	1	108
Ceratitis.cosyra	2	5	0	1	1	0	2	0	2	0	2
Ceratitis.cosyra	2	5	0	1	1	0	2	2	3.5	0	3.5
Ceratitis.cosyra	2	5	0	1	1	1	2	3.5	4.7	0	4.7
Ceratitis.cosyra	2	5	0	1	1	1	2	4.7	13.5	1	13.5
Ceratitis.cosyra	2	4	0	1	2	0	3	0	4.2	0	4.2
Ceratitis.cosyra	2	4	0	1	2	0	3	4.2	120.7	0	120.7
Ceratitis.cosyra	2	4	0	1	2	0	3	120.7	124.3	0	124.3
Ceratitis.cosyra	2	4	0	1	2	1	3	124.3	125.1	0	125.1
Ceratitis.cosyra	2	4	0	1	2	1	3	125.1	240.6	1	240.6
Ceratitis.cosyra	2	4	0	1	6	0	4	0	4.5	0	4.5
Ceratitis.cosyra	2	5	0	1	6	0	4	4.5	11.1	0	11.1
Ceratitis.cosyra	2	4	0	1	6	0	4	11.1	59.2	0	59.2
Ceratitis.cosyra	2	4	0	1	6	0	4	59.2	67.6	0	67.6
Ceratitis.cosyra	2	4	0	1	6	0	4	67.6	69.4	0	69.4
Ceratitis.cosyra	2	4	0	1	6	1	4	69.4	76.5	0	76.5
Ceratitis.cosyra	2	4	0	1	6	1	4	76.5	90.2	1	90.2
Ceratitis.cosyra	2	4	0	1	6	0	5	0	2.1	0	2.1
Ceratitis.cosyra	2	4	0	1	6	0	5	2.1	139.9	0	139.9
Ceratitis.cosyra	2	4	0	1	6	0	5	139.9	141.4	0	141.4
Ceratitis.cosyra	2	4	0	1	6	1	5	141.4	145.3	0	145.3
Ceratitis.cosyra	2	4	0	1	6	1	5	145.3	195.8	0	195.8
Ceratitis.cosyra	2	4	0	1	6	1	5	195.8	290.6	1	290.6
Ceratitis.cosyra	3	1	0	0	0	0	0	0	1.1	0	1.1
Ceratitis.cosyra	3	1	0	0	0	0	0	1.1	7.1	0	7.1
Ceratitis.cosyra	3	2	0	0	0	0	0	7.1	23.2	0	23.2
Ceratitis.cosyra	3	1	0	0	0	0	0	23.2	44.9	0	44.9
Ceratitis.cosyra	3	1	0	0	0	0	0	44.9	50.9	0	50.9
Ceratitis.cosyra	3	0	0	0	0	0	0	50.9	57.1	0	57.1
Ceratitis.cosyra	3	1	0	0	0	0	0	57.1	59.7	0	59.7
Ceratitis.cosyra	3	1	0	1	0	0	0	59.7	63.4	0	63.4
Ceratitis.cosyra	3	1	0	1	0	0	0	63.4	75.3	0	75.3
Ceratitis.cosyra	3	1	0	2	0	0	0	75.3	81.9	0	81.9
Ceratitis.cosyra	3	1	0	2	0	0	0	81.9	117.4	0	117.4
Ceratitis.cosyra	3	0	0	2	0	0	0	117.4	134.8	0	134.8
Ceratitis.cosyra	3	1	0	2	0	0	0	134.8	148.7	0	148.7
Ceratitis.cosyra	3	1	0	3	0	0	0	148.7	155.6	0	155.6
Ceratitis.cosyra	3	1	0	3	0	0	0	155.6	160.6	0	160.6
Ceratitis.cosyra	3	1	0	4	0	0	0	160.6	177.8	0	177.8
Ceratitis.cosyra	3	1	0	4	0	0	0	177.8	180.1	0	180.1
Ceratitis.cosyra	3	1	0	4	0	1	0	180.1	185.7	0	185.7
Ceratitis.cosyra	3	1	0	4	0	1	0	185.7	198.6	1	198.6
Ceratitis.cosyra	3	1	0	0	0	0	1	0	11.2	0	11.2
Ceratitis.cosyra	3	1	0	0	0	0	1	11.2	15.2	0	15.2
Ceratitis.cosyra	3	1	0	0	0	1	1	15.2	17.9	0	17.9
Ceratitis.cosyra	3	1	0	0	0	1	1	17.9	66.7	1	66.7
Ceratitis.cosyra	3	1	0	0	1	0	2	0	149.7	0	149.7
Ceratitis.cosyra	3	3	0	0	1	0	2	149.7	200.6	0	200.6
Ceratitis.cosyra	3	3	0	1	1	0	2	200.6	346.6	0	346.6
Ceratitis.cosyra	3	3	0	1	1	0	2	346.6	358.3	0	358.3
Ceratitis.cosyra	3	0	0	1	1	0	2	358.3	389.2	0	389.2
Ceratitis.cosyra	3	0	0	2	1	0	2	389.2	764.8	0	764.8
Ceratitis.cosyra	3	0	0	2	1	0	2	764.8	774.6	0	774.6
Ceratitis.cosyra	3	1	0	2	1	0	2	774.6	927.8	0	927.8
Ceratitis.cosyra	3	1	0	2	1	0	2	927.8	932.3	0	932.3
Ceratitis.cosyra	3	1	0	2	1	1	2	932.3	935.6	0	935.6
Ceratitis.cosyra	3	1	0	2	1	1	2	935.6	975.5	1	975.5
Ceratitis.cosyra	3	1	0	0	1	0	3	0	3.4	0	3.4
Ceratitis.cosyra	3	1	0	0	1	0	3	3.4	4.9	0	4.9
Ceratitis.cosyra	3	1	0	0	1	1	3	4.9	5.2	0	5.2
Ceratitis.cosyra	3	1	0	0	1	1	3	5.2	84.9	1	84.9
Ceratitis.cosyra	3	1	0	0	1	0	4	0	1.1	0	1.1
Ceratitis.cosyra	3	0	0	0	1	0	4	1.1	64.2	0	64.2
Ceratitis.cosyra	3	1	0	0	1	0	4	64.2	66.5	0	66.5
Ceratitis.cosyra	3	1	0	0	1	1	4	66.5	69.1	0	69.1
Ceratitis.cosyra	3	1	0	0	1	1	4	69.1	431.3	1	431.3
Ceratitis.cosyra	3	1	0	0	1	0	5	0	5.3	0	5.3
Ceratitis.cosyra	3	1	0	0	1	0	5	5.3	8.7	0	8.7
Ceratitis.cosyra	3	1	0	0	1	1	5	8.7	11.5	0	11.5
Ceratitis.cosyra	3	1	0	0	1	1	5	11.5	61.7	1	61.7
Ceratitis.cosyra	4	1	0	0	0	0	0	0	1.1	0	1.1
Ceratitis.cosyra	4	1	0	0	0	0	0	1.1	3	0	3
Ceratitis.cosyra	4	1	0	0	0	0	0	3	21.7	0	21.7
Ceratitis.cosyra	4	1	0	0	0	0	0	21.7	23.7	0	23.7
Ceratitis.cosyra	4	1	0	0	0	1	0	23.7	24.9	0	24.9
Ceratitis.cosyra	4	1	0	0	0	1	0	24.9	32	1	32
Ceratitis.cosyra	4	0	0	0	1	0	1	0	163.8	0	163.8
Ceratitis.cosyra	4	0	0	1	1	0	1	163.8	229.2	0	229.2
Ceratitis.cosyra	4	0	0	1	1	0	1	229.2	467.8	0	467.8
Ceratitis.cosyra	4	0	0	1	1	0	1	467.8	487.5	1	487.5
Ceratitis.cosyra	4	0	0	0	1	0	2	0	75.8	0	75.8
Ceratitis.cosyra	4	0	0	1	1	0	2	75.8	133.1	0	133.1
Ceratitis.cosyra	4	0	0	1	1	0	2	133.1	149.5	0	149.5
Ceratitis.cosyra	4	1	0	1	1	0	2	149.5	155.9	0	155.9
Ceratitis.cosyra	4	1	0	1	1	1	2	155.9	160.3	0	160.3
Ceratitis.cosyra	4	1	0	1	1	1	2	160.3	368.8	1	368.8
Ceratitis.cosyra	4	2	0	0	1	0	3	0	4.8	0	4.8
Ceratitis.cosyra	4	1	0	0	1	0	3	4.8	13.5	0	13.5
Ceratitis.cosyra	4	2	0	0	1	0	3	13.5	111.9	0	111.9
Ceratitis.cosyra	4	1	0	0	1	0	3	111.9	229.3	0	229.3
Ceratitis.cosyra	5	0	0	0	0	0	0	0	0.7	0	0.7
Ceratitis.cosyra	5	0	0	0	0	0	0	0.7	4.5	0	4.5
Ceratitis.cosyra	5	0	0	0	0	0	0	4.5	34.9	0	34.9
Ceratitis.cosyra	5	0	0	1	0	0	0	34.9	116.7	0	116.7
Ceratitis.cosyra	5	0	0	1	0	0	0	116.7	140	0	140
Ceratitis.cosyra	5	0	0	1	0	0	0	140	158	0	158
Ceratitis.cosyra	5	0	0	1	0	0	0	158	165.2	0	165.2
Ceratitis.cosyra	5	1	0	1	0	0	0	165.2	166.5	0	166.5
Ceratitis.cosyra	5	1	0	1	0	0	0	166.5	177.4	0	177.4
Ceratitis.cosyra	5	0	0	1	0	0	0	177.4	202.4	0	202.4
Ceratitis.cosyra	5	0	0	1	0	0	0	202.4	275.9	0	275.9
Ceratitis.cosyra	5	1	0	1	0	0	0	275.9	313	0	313
Ceratitis.cosyra	5	1	0	2	0	0	0	313	458	0	458
Ceratitis.cosyra	5	1	0	2	0	0	0	458	496.1	0	496.1
Ceratitis.cosyra	5	1	0	3	0	0	0	496.1	693.2	0	693.2
Ceratitis.cosyra	5	1	0	3	0	0	0	693.2	730.1	0	730.1
Ceratitis.cosyra	5	1	0	3	0	0	0	730.1	941.6	0	941.6
Ceratitis.cosyra	5	1	0	3	0	0	0	941.6	943.8	0	943.8
Ceratitis.cosyra	5	1	0	3	0	1	0	943.8	944.6	0	944.6
Ceratitis.cosyra	5	1	0	3	0	1	0	944.6	946.9	1	946.9
Ceratitis.cosyra	5	0	0	0	0	0	1	0	2.8	0	2.8
Ceratitis.cosyra	5	0	0	0	0	0	1	2.8	238.3	0	238.3
Ceratitis.cosyra	5	0	0	0	0	0	1	238.3	243.9	1	243.9
Ceratitis.cosyra	5	0	0	0	0	0	2	0	2.3	0	2.3
Ceratitis.cosyra	5	0	0	0	0	0	2	2.3	4.7	0	4.7
Ceratitis.cosyra	5	0	0	0	0	0	2	4.7	5.6	0	5.6
Ceratitis.cosyra	5	0	0	0	0	0	2	5.6	131.8	1	131.8
Ceratitis.cosyra	5	0	0	0	0	0	3	0	6.7	0	6.7
Ceratitis.cosyra	5	1	0	0	0	0	3	6.7	18.1	0	18.1
Ceratitis.cosyra	5	1	0	0	0	0	3	18.1	21.5	0	21.5
Ceratitis.cosyra	5	0	0	0	0	0	3	21.5	30.4	0	30.4
Ceratitis.cosyra	5	0	0	1	0	0	3	30.4	172.8	0	172.8
Ceratitis.cosyra	5	0	0	1	0	0	3	172.8	313.2	0	313.2
Ceratitis.cosyra	6	0	0	0	0	0	0	0	1.9	0	1.9
Ceratitis.cosyra	6	0	0	0	0	0	0	1.9	139.3	0	139.3
Ceratitis.cosyra	6	0	0	1	0	0	0	139.3	201.4	0	201.4
Ceratitis.cosyra	6	1	0	1	0	0	0	201.4	206.6	0	206.6
Ceratitis.cosyra	6	1	0	1	0	0	0	206.6	262.6	0	262.6
Ceratitis.cosyra	6	1	0	2	0	0	0	262.6	263.1	0	263.1
Ceratitis.cosyra	6	0	0	2	0	0	0	263.1	273.6	0	273.6
Ceratitis.cosyra	6	0	0	2	0	0	0	273.6	291.6	0	291.6
Ceratitis.cosyra	6	0	0	3	0	0	0	291.6	373.1	0	373.1
Ceratitis.cosyra	6	0	0	3	0	1	0	373.1	375.5	0	375.5
Ceratitis.cosyra	6	0	0	4	0	1	0	375.5	536.5	0	536.5
Ceratitis.cosyra	6	0	0	4	0	2	0	536.5	539.8	0	539.8
Ceratitis.cosyra	6	0	0	5	0	2	0	539.8	622.2	0	622.2
Ceratitis.cosyra	6	0	0	5	0	2	0	622.2	640.8	0	640.8
Ceratitis.cosyra	6	0	0	6	0	2	0	640.8	1451.2	0	1451.2
Ceratitis.cosyra	6	0	0	6	0	3	0	1451.2	1465.6	0	1465.6
Ceratitis.cosyra	6	1	0	6	0	3	0	1465.6	1821.5	0	1821.5
Ceratitis.cosyra	6	1	0	6	0	3	0	1821.5	1824.9	0	1824.9
Ceratitis.cosyra	6	1	0	6	0	4	0	1824.9	1835	0	1835
Ceratitis.cosyra	6	1	0	6	0	4	0	1835	2024.7	1	2024.7
Ceratitis.cosyra	7	0	0	0	0	0	0	0	56.7	0	56.7
Ceratitis.cosyra	7	0	0	1	0	0	0	56.7	165	0	165
Ceratitis.cosyra	7	0	0	1	0	0	0	165	208	0	208
Ceratitis.cosyra	7	0	0	1	0	0	0	208	247.2	1	247.2
Ceratitis.cosyra	7	0	0	0	0	0	1	0	235.5	0	235.5
Ceratitis.cosyra	7	0	0	1	0	0	1	235.5	475.7	0	475.7
Ceratitis.cosyra	7	0	0	1	0	0	1	475.7	478.9	0	478.9
Ceratitis.cosyra	7	0	1	1	0	0	1	478.9	702.7	0	702.7
Ceratitis.cosyra	7	0	1	1	0	0	1	702.7	879.2	0	879.2
Ceratitis.cosyra	7	1	1	1	0	0	1	879.2	932.2	0	932.2
Ceratitis.cosyra	7	1	1	1	0	0	1	932.2	976.1	0	976.1
Ceratitis.cosyra	7	2	1	1	0	0	1	976.1	1071.6	0	1071.6
Ceratitis.cosyra	7	2	1	2	0	0	1	1071.6	1087.4	0	1087.4
Ceratitis.cosyra	7	2	1	2	0	0	1	1087.4	1112.1	0	1112.1
Ceratitis.cosyra	7	2	1	3	0	0	1	1112.1	1250.6	0	1250.6
Ceratitis.cosyra	7	2	2	3	0	0	1	1250.6	1339.5	0	1339.5
Ceratitis.cosyra	7	2	2	3	0	0	1	1339.5	1505	1	1505
Ceratitis.cosyra	8	0	0	0	0	0	0	0	21.7	0	21.7
Ceratitis.cosyra	8	0	0	0	0	0	0	21.7	207.2	0	207.2
Ceratitis.cosyra	8	0	0	1	0	0	0	207.2	376	0	376
Ceratitis.cosyra	8	0	0	1	0	0	0	376	387.4	0	387.4
Ceratitis.cosyra	8	0	0	1	0	0	0	387.4	396	0	396
Ceratitis.cosyra	8	0	0	2	0	0	0	396	424.7	0	424.7
Ceratitis.cosyra	8	0	0	2	0	0	0	424.7	426.7	0	426.7
Ceratitis.cosyra	8	0	0	2	0	0	0	426.7	439.4	0	439.4
Ceratitis.cosyra	8	0	0	3	0	0	0	439.4	483.8	0	483.8
Ceratitis.cosyra	8	0	1	3	0	0	0	483.8	493.4	0	493.4
Ceratitis.cosyra	8	1	1	3	0	0	0	493.4	498.2	0	498.2
Ceratitis.cosyra	8	1	1	3	0	1	0	498.2	500.7	0	500.7
Ceratitis.cosyra	8	1	1	3	0	1	0	500.7	535.6	0	535.6
Ceratitis.cosyra	8	2	1	3	0	1	0	535.6	546.8	0	546.8
Ceratitis.cosyra	8	2	1	3	0	1	0	546.8	549	0	549
Ceratitis.cosyra	8	2	1	3	0	2	0	549	550.7	0	550.7
Ceratitis.cosyra	8	2	1	3	0	2	0	550.7	753.9	1	753.9
Ceratitis.cosyra	8	2	0	0	0	0	1	0	65.7	0	65.7
Ceratitis.cosyra	8	2	0	0	0	0	1	65.7	75.3	1	75.3
Ceratitis.cosyra	8	2	0	0	2	0	0	0	14.5	0	14.5
Ceratitis.cosyra	8	1	0	0	2	0	0	14.5	430.8	0	430.8
Ceratitis.cosyra	8	1	0	0	2	0	0	430.8	440	1	440
Ceratitis.cosyra	9	2	0	0	0	0	0	0	3.5	0	3.5
Ceratitis.cosyra	9	2	0	0	0	0	0	3.5	113.5	0	113.5
Ceratitis.cosyra	9	2	0	0	0	1	0	113.5	114.5	0	114.5
Ceratitis.cosyra	9	2	0	0	0	1	0	114.5	118.5	1	118.5
Ceratitis.cosyra	9	2	0	0	0	0	1	0	23.8	0	23.8
Ceratitis.cosyra	9	5	0	0	0	0	1	23.8	105.1	0	105.1
Ceratitis.cosyra	9	5	0	0	0	1	1	105.1	105.8	0	105.8
Ceratitis.cosyra	9	5	0	0	0	1	1	105.8	121.1	1	121.1
Ceratitis.cosyra	9	6	0	0	3	0	2	0	2.4	0	2.4
Ceratitis.cosyra	9	4	0	0	3	0	2	2.4	21.5	0	21.5
Ceratitis.cosyra	9	4	0	0	3	1	2	21.5	22.8	0	22.8
Ceratitis.cosyra	9	4	0	0	3	1	2	22.8	156.6	1	156.6
Ceratitis.cosyra	9	8	0	0	3	0	3	0	3.7	0	3.7
Ceratitis.cosyra	9	8	0	0	3	1	3	3.7	5	0	5
Ceratitis.cosyra	9	8	0	0	3	1	3	5	348.9	1	348.9
Ceratitis.cosyra	9	8	0	0	3	0	4	0	2.8	0	2.8
Ceratitis.cosyra	9	5	0	0	3	0	4	2.8	14.7	0	14.7
Ceratitis.cosyra	9	5	0	0	3	1	4	14.7	15.6	0	15.6
Ceratitis.cosyra	9	5	0	0	3	1	4	15.6	46.9	1	46.9
Ceratitis.cosyra	10	0	0	0	0	0	0	0	1.5	0	1.5
Ceratitis.cosyra	10	0	0	0	0	0	0	1.5	3.4	0	3.4
Ceratitis.cosyra	10	0	0	0	0	0	0	3.4	38.1	0	38.1
Ceratitis.cosyra	10	0	0	0	0	0	0	38.1	109.2	1	109.2
Ceratitis.cosyra	10	0	0	0	0	0	1	0	4.5	0	4.5
Ceratitis.cosyra	10	1	0	0	0	0	1	4.5	34.1	0	34.1
Ceratitis.cosyra	10	0	0	0	0	0	1	34.1	51.8	0	51.8
Ceratitis.cosyra	10	0	0	0	0	0	1	51.8	76.4	1	76.4
Ceratitis.cosyra	10	0	0	0	0	0	2	0	107.1	0	107.1
Ceratitis.cosyra	10	0	0	1	0	0	2	107.1	120.6	0	120.6
Ceratitis.cosyra	10	0	0	1	0	0	2	120.6	123.5	0	123.5
Ceratitis.cosyra	10	0	0	1	0	0	2	123.5	208.4	0	208.4
Ceratitis.cosyra	10	0	0	1	0	0	2	208.4	267.8	0	267.8
Ceratitis.cosyra	10	1	0	1	0	0	2	267.8	339.1	0	339.1
Ceratitis.cosyra	10	1	0	2	0	0	2	339.1	351.2	0	351.2
Ceratitis.cosyra	10	1	0	2	0	0	2	351.2	353.8	0	353.8
Ceratitis.cosyra	10	1	0	2	0	1	2	353.8	357.6	0	357.6
Ceratitis.cosyra	10	1	0	2	0	1	2	357.6	359.4	0	359.4
Ceratitis.cosyra	10	1	0	2	0	2	2	359.4	362.8	0	362.8
Ceratitis.cosyra	10	1	0	2	0	2	2	362.8	368.7	1	368.7
Ceratitis.cosyra	10	1	0	0	0	0	3	0	54.3	0	54.3
Ceratitis.cosyra	10	1	0	0	0	0	3	54.3	68.9	0	68.9
Ceratitis.cosyra	10	0	0	0	0	0	3	68.9	145.5	0	145.5
Ceratitis.cosyra	10	0	0	1	0	0	3	145.5	214.5	0	214.5
Ceratitis.cosyra	10	1	0	1	0	0	3	214.5	286.8	0	286.8
Ceratitis.cosyra	10	0	0	1	0	0	3	286.8	307.5	0	307.5
Ceratitis.cosyra	10	0	0	1	0	0	3	307.5	326.1	0	326.1
Ceratitis.cosyra	10	1	0	1	0	0	3	326.1	330.5	0	330.5
Ceratitis.cosyra	10	1	0	1	0	0	3	330.5	332.8	0	332.8
Ceratitis.cosyra	10	1	0	1	0	1	3	332.8	333.9	0	333.9
Ceratitis.cosyra	10	1	0	1	0	1	3	333.9	340.3	1	340.3
Ceratitis.cosyra	11	0	0	0	0	0	0	0	3.2	0	3.2
Ceratitis.cosyra	11	0	0	0	0	0	0	3.2	48	0	48
Ceratitis.cosyra	11	0	0	1	0	0	0	48	70.7	0	70.7
Ceratitis.cosyra	11	1	0	1	0	0	0	70.7	76.6	0	76.6
Ceratitis.cosyra	11	1	0	1	0	0	0	76.6	82.2	0	82.2
Ceratitis.cosyra	11	0	0	1	0	0	0	82.2	177.6	0	177.6
Ceratitis.cosyra	11	0	0	2	0	0	0	177.6	192.6	0	192.6
Ceratitis.cosyra	11	0	0	2	0	0	0	192.6	241	0	241
Ceratitis.cosyra	11	1	0	2	0	0	0	241	296.9	0	296.9
Ceratitis.cosyra	11	1	0	3	0	0	0	296.9	300.6	0	300.6
Ceratitis.cosyra	11	1	0	3	0	0	0	300.6	302.8	0	302.8
Ceratitis.cosyra	11	1	0	3	0	1	0	302.8	306.6	0	306.6
Ceratitis.cosyra	11	1	0	3	0	1	0	306.6	310.8	0	310.8
Ceratitis.cosyra	11	1	0	3	0	1	0	310.8	365.9	1	365.9
Ceratitis.cosyra	11	1	0	0	0	0	1	0	16.5	0	16.5
Ceratitis.cosyra	11	1	0	1	0	0	1	16.5	21.1	0	21.1
Ceratitis.cosyra	11	1	0	1	0	0	1	21.1	28.2	0	28.2
Ceratitis.cosyra	11	0	0	1	0	0	1	28.2	43.1	0	43.1
Ceratitis.cosyra	11	0	0	1	0	0	1	43.1	57	0	57
Ceratitis.cosyra	11	1	0	1	0	0	1	57	59.4	0	59.4
Ceratitis.cosyra	11	2	0	1	0	0	1	59.4	69.2	0	69.2
Ceratitis.cosyra	11	1	0	1	0	0	1	69.2	76.1	0	76.1
Ceratitis.cosyra	11	1	0	2	0	0	1	76.1	80.4	0	80.4
Ceratitis.cosyra	11	1	0	2	0	0	1	80.4	84.7	0	84.7
Ceratitis.cosyra	11	1	0	2	0	1	1	84.7	112.7	0	112.7
Ceratitis.cosyra	11	1	0	3	0	1	1	112.7	197.1	0	197.1
Ceratitis.cosyra	11	1	0	3	0	2	1	197.1	199.6	0	199.6
Ceratitis.cosyra	11	1	0	3	0	2	1	199.6	242.1	1	242.1
Ceratitis.cosyra	11	1	0	0	0	0	2	0	4.5	0	4.5
Ceratitis.cosyra	11	1	0	0	0	0	2	4.5	66.1	0	66.1
Ceratitis.cosyra	11	2	0	0	0	0	2	66.1	74.9	0	74.9
Ceratitis.cosyra	11	2	0	1	0	0	2	74.9	163.1	0	163.1
Ceratitis.cosyra	11	2	0	1	0	0	2	163.1	167.8	0	167.8
Ceratitis.cosyra	11	3	0	1	0	0	2	167.8	181	0	181
Ceratitis.cosyra	11	3	0	1	0	1	2	181	183.1	0	183.1
Ceratitis.cosyra	11	3	0	1	0	1	2	183.1	266.2	1	266.2
Ceratitis.cosyra	11	3	0	0	0	0	3	0	9.5	0	9.5
Ceratitis.cosyra	11	3	0	0	0	1	3	9.5	10.3	0	10.3
Ceratitis.cosyra	11	3	0	0	0	1	3	10.3	63.3	1	63.3
Ceratitis.cosyra	11	3	0	0	0	0	4	0	4.1	0	4.1
Ceratitis.cosyra	11	2	0	0	0	0	4	4.1	87.6	0	87.6
Ceratitis.cosyra	11	2	0	1	0	0	4	87.6	91.1	0	91.1
Ceratitis.cosyra	11	1	0	1	0	0	4	91.1	102.7	0	102.7
Ceratitis.cosyra	11	1	0	1	0	0	4	102.7	209.1	0	209.1
Ceratitis.cosyra	11	2	0	1	0	0	4	209.1	224.3	0	224.3
Ceratitis.cosyra	11	2	0	1	0	1	4	224.3	227.8	0	227.8
Ceratitis.cosyra	11	2	0	1	0	1	4	227.8	230.6	0	230.6
Ceratitis.cosyra	11	2	0	0	0	0	5	0	218.9	0	218.9
Ceratitis.cosyra	11	2	0	0	0	0	5	218.9	220.3	0	220.3
Ceratitis.cosyra	11	2	0	0	0	0	5	220.3	225	1	225
Ceratitis.cosyra	11	2	0	0	0	0	6	0	80.4	0	80.4
Ceratitis.cosyra	11	2	0	0	0	0	6	80.4	81.8	0	81.8
Ceratitis.cosyra	11	2	0	0	0	0	6	81.8	484.4	1	484.4
Ceratitis.cosyra	12	0	0	0	0	0	0	0	6.1	0	6.1
Ceratitis.cosyra	12	0	0	0	0	0	0	6.1	99.6	0	99.6
Ceratitis.cosyra	12	0	0	1	0	0	0	99.6	108.6	0	108.6
Ceratitis.cosyra	12	0	0	1	0	0	0	108.6	313.4	0	313.4
Ceratitis.cosyra	12	1	0	1	0	0	0	313.4	317.5	0	317.5
Ceratitis.cosyra	12	1	0	2	0	0	0	317.5	330.5	0	330.5
Ceratitis.cosyra	12	1	0	2	0	1	0	330.5	340.6	0	340.6
Ceratitis.cosyra	12	1	0	2	0	1	0	340.6	342.5	0	342.5
Ceratitis.cosyra	12	1	0	2	0	1	0	342.5	394.6	1	394.6
Ceratitis.cosyra	12	1	0	0	0	0	1	0	4.5	0	4.5
Ceratitis.cosyra	12	3	0	0	0	0	1	4.5	61.9	0	61.9
Ceratitis.cosyra	12	3	0	1	0	0	1	61.9	107.1	0	107.1
Ceratitis.cosyra	12	3	0	1	0	1	1	107.1	110.3	0	110.3
Ceratitis.cosyra	12	3	0	1	0	1	1	110.3	134.9	1	134.9
Ceratitis.cosyra	12	3	0	0	1	0	2	0	6.1	0	6.1
Ceratitis.cosyra	12	2	0	0	1	0	2	6.1	80	0	80
Ceratitis.cosyra	12	2	0	1	1	0	2	80	83.3	0	83.3
Ceratitis.cosyra	12	2	0	1	1	0	2	83.3	99	0	99
Ceratitis.cosyra	12	2	0	1	1	0	2	99	101.4	0	101.4
Ceratitis.cosyra	12	2	0	2	1	1	2	101.4	162.1	0	162.1
Ceratitis.cosyra	12	2	0	2	1	1	2	162.1	205.7	0	205.7
Ceratitis.cosyra	12	2	0	2	1	2	2	205.7	210.8	0	210.8
Ceratitis.cosyra	12	2	0	2	1	2	2	210.8	334	1	334
Ceratitis.cosyra	12	2	0	0	2	0	3	0	5	0	5
Ceratitis.cosyra	12	4	0	0	2	0	3	5	119.9	0	119.9
Ceratitis.cosyra	12	4	0	0	2	0	3	119.9	123.7	0	123.7
Ceratitis.cosyra	12	4	0	0	2	0	3	123.7	231.3	1	231.3
Ceratitis.cosyra	12	4	0	0	3	0	4	0	10.5	0	10.5
Ceratitis.cosyra	12	2	0	0	3	0	4	10.5	189.8	0	189.8
Ceratitis.cosyra	12	2	0	0	3	0	4	189.8	223.5	1	223.5
Ceratitis.cosyra	12	2	0	0	3	0	5	0	19.2	0	19.2
Ceratitis.cosyra	12	2	0	0	3	0	5	19.2	20.5	0	20.5
Ceratitis.cosyra	12	2	0	0	3	0	5	20.5	139.9	1	139.9
Ceratitis.cosyra	13	0	0	0	0	0	0	0	4.7	0	4.7
Ceratitis.cosyra	13	0	0	0	0	0	0	4.7	46.3	0	46.3
Ceratitis.cosyra	13	0	0	0	0	0	0	46.3	50.8	0	50.8
Ceratitis.cosyra	13	0	0	1	0	0	0	50.8	221.3	0	221.3
Ceratitis.cosyra	13	0	0	1	0	0	0	221.3	224.7	0	224.7
Ceratitis.cosyra	13	1	0	1	0	0	0	224.7	317.1	0	317.1
Ceratitis.cosyra	13	1	0	1	0	0	0	317.1	319.2	0	319.2
Ceratitis.cosyra	13	1	0	1	0	1	0	319.2	321.2	0	321.2
Ceratitis.cosyra	13	1	0	0	0	1	1	321.2	443.5	1	443.5
Ceratitis.cosyra	13	1	0	0	0	0	1	0	3.5	0	3.5
Ceratitis.cosyra	13	1	0	0	0	0	1	3.5	8.8	0	8.8
Ceratitis.cosyra	13	0	0	0	0	0	1	8.8	34.4	0	34.4
Ceratitis.cosyra	13	0	0	1	0	0	1	34.4	35.4	0	35.4
Ceratitis.cosyra	13	0	0	1	0	0	1	35.4	37.8	0	37.8
Ceratitis.cosyra	13	0	0	2	0	0	1	37.8	47.5	0	47.5
Ceratitis.cosyra	13	1	0	2	0	0	1	47.5	104.9	0	104.9
Ceratitis.cosyra	13	1	0	2	0	0	1	104.9	108.9	0	108.9
Ceratitis.cosyra	13	1	0	2	0	1	1	108.9	115.8	0	115.8
Ceratitis.cosyra	13	2	0	2	0	1	1	115.8	199.7	0	199.7
Ceratitis.cosyra	13	2	0	2	0	1	1	199.7	203.2	1	203.2
Ceratitis.cosyra	13	3	0	0	0	0	2	0	7.8	0	7.8
Ceratitis.cosyra	13	3	0	0	0	1	2	7.8	8.8	0	8.8
Ceratitis.cosyra	13	3	0	0	0	1	2	8.8	57.3	1	57.3
Ceratitis.cosyra	13	3	0	0	0	0	3	0	4.6	0	4.6
Ceratitis.cosyra	13	3	0	0	0	0	3	4.6	36.5	0	36.5
Ceratitis.cosyra	13	3	0	1	0	0	3	36.5	149.9	0	149.9
Ceratitis.cosyra	13	3	0	1	0	0	3	149.9	151	0	151
Ceratitis.cosyra	13	3	0	1	0	1	3	151	156.3	0	156.3
Ceratitis.cosyra	13	3	0	1	0	1	3	156.3	216.5	1	216.5
Ceratitis.cosyra	13	3	0	0	0	0	4	0	2	0	2
Ceratitis.cosyra	13	2	0	0	0	0	4	2	129.8	0	129.8
Ceratitis.cosyra	13	2	0	1	0	0	4	129.8	131.6	0	131.6
Ceratitis.cosyra	13	1	0	1	0	0	4	131.6	151	0	151
Ceratitis.cosyra	13	1	0	1	0	0	4	151	207.9	0	207.9
Ceratitis.cosyra	13	1	0	1	0	0	4	207.9	210.5	0	210.5
Ceratitis.cosyra	13	2	0	1	0	0	4	210.5	218.6	0	218.6
Ceratitis.cosyra	13	2	0	1	0	0	4	218.6	283	0	283
Ceratitis.cosyra	13	2	0	2	0	0	4	283	285.8	0	285.8
Ceratitis.cosyra	13	2	0	2	0	0	4	285.8	344.6	0	344.6
Ceratitis.cosyra	13	2	0	2	0	0	4	344.6	347.4	0	347.4
Ceratitis.cosyra	13	3	0	2	0	0	4	347.4	361.7	0	361.7
Ceratitis.cosyra	13	3	0	2	0	1	4	361.7	363	0	363
Ceratitis.cosyra	13	3	0	2	0	1	4	363	485.3	1	485.3
Ceratitis.cosyra	13	3	0	0	0	0	5	0	3.4	0	3.4
Ceratitis.cosyra	13	3	0	0	0	0	5	3.4	52.2	0	52.2
Ceratitis.cosyra	13	3	0	0	0	0	5	52.2	61.5	0	61.5
Ceratitis.cosyra	13	3	0	1	0	0	5	61.5	72.7	0	72.7
Ceratitis.cosyra	13	3	0	1	0	0	5	72.7	85.1	0	85.1
Ceratitis.cosyra	13	3	0	1	0	1	5	85.1	92.2	0	92.2
Ceratitis.cosyra	13	3	0	1	0	1	5	92.2	95.5	1	95.5
Ceratitis.cosyra	13	2	0	0	0	0	6	0	2.7	0	2.7
Ceratitis.cosyra	13	4	0	0	0	0	6	2.7	15.8	0	15.8
Ceratitis.cosyra	13	3	0	0	0	0	6	15.8	22.1	0	22.1
Ceratitis.cosyra	13	3	0	1	0	0	6	22.1	34.7	0	34.7
Ceratitis.cosyra	13	3	0	1	0	1	6	34.7	40.8	0	40.8
Ceratitis.cosyra	13	3	0	1	0	1	6	40.8	47.4	1	47.4
Ceratitis.cosyra	13	3	0	0	1	0	7	0	4.5	0	4.5
Ceratitis.cosyra	13	3	0	0	1	0	7	4.5	15.3	0	15.3
Ceratitis.cosyra	13	3	0	0	1	0	7	15.3	43	1	43
Ceratitis.cosyra	14	0	0	0	0	0	0	0	2.3	0	2.3
Ceratitis.cosyra	14	0	0	0	0	0	0	2.3	32.5	0	32.5
Ceratitis.cosyra	14	0	0	1	0	0	0	32.5	47.2	0	47.2
Ceratitis.cosyra	14	0	0	1	0	0	0	47.2	198.1	0	198.1
Ceratitis.cosyra	14	0	0	2	0	0	0	198.1	199.3	0	199.3
Ceratitis.cosyra	14	0	0	2	0	0	0	199.3	320.6	0	320.6
Ceratitis.cosyra	14	0	0	2	0	0	0	320.6	428.7	0	428.7
Ceratitis.cosyra	14	1	0	2	0	0	0	428.7	534.6	0	534.6
Ceratitis.cosyra	14	1	0	3	0	0	0	534.6	538.2	0	538.2
Ceratitis.cosyra	14	1	0	3	0	0	0	538.2	602.8	0	602.8
Ceratitis.cosyra	14	1	0	3	0	0	0	602.8	608.7	0	608.7
Ceratitis.cosyra	14	0	0	3	0	0	0	608.7	707.1	0	707.1
Ceratitis.cosyra	14	1	0	3	0	0	0	707.1	710	0	710
Ceratitis.cosyra	14	1	0	3	0	0	0	710	720.1	0	720.1
Ceratitis.cosyra	14	1	0	4	0	0	0	720.1	819	0	819
Ceratitis.cosyra	14	1	0	4	0	0	0	819	822.4	0	822.4
Ceratitis.cosyra	14	1	0	4	0	1	0	822.4	823.2	0	823.2
Ceratitis.cosyra	14	1	0	4	0	1	0	823.2	859.6	1	859.6
Ceratitis.cosyra	14	1	0	0	0	0	1	0	36.2	0	36.2
Ceratitis.cosyra	14	1	0	0	0	0	1	36.2	42.4	0	42.4
Ceratitis.cosyra	14	0	0	0	0	0	1	42.4	165.2	0	165.2
Ceratitis.cosyra	14	0	0	1	0	0	1	165.2	172.2	0	172.2
Ceratitis.cosyra	14	1	0	1	0	0	1	172.2	175	0	175
Ceratitis.cosyra	14	1	0	1	0	0	1	175	273.3	0	273.3
Ceratitis.cosyra	14	1	0	1	0	1	1	273.3	276.8	0	276.8
Ceratitis.cosyra	14	1	0	1	0	1	1	276.8	411.2	1	411.2
Ceratitis.cosyra	14	1	0	0	0	0	2	0	138.5	0	138.5
Ceratitis.cosyra	14	1	0	1	0	0	2	138.5	144.3	0	144.3
Ceratitis.cosyra	14	1	0	1	0	0	2	144.3	146.3	0	146.3
Ceratitis.cosyra	14	1	0	1	0	1	2	146.3	147.1	0	147.1
Ceratitis.cosyra	14	1	0	1	0	1	2	147.1	213.9	1	213.9
Ceratitis.cosyra	14	1	0	0	0	0	3	0	2.1	0	2.1
Ceratitis.cosyra	14	2	0	0	0	0	3	2.1	83.8	0	83.8
Ceratitis.cosyra	14	2	0	0	0	0	3	83.8	94.6	1	94.6
Ceratitis.cosyra	15	0	0	0	0	0	0	0	36.3	0	36.3
Ceratitis.cosyra	15	0	0	0	0	0	0	36.3	63	0	63
Ceratitis.cosyra	15	0	0	1	0	0	0	63	68.1	0	68.1
Ceratitis.cosyra	15	0	0	1	0	0	0	68.1	168.1	0	168.1
Ceratitis.cosyra	15	0	0	1	0	0	0	168.1	173.4	0	173.4
Ceratitis.cosyra	15	0	0	1	0	0	0	173.4	179.4	0	179.4
Ceratitis.cosyra	15	1	0	1	0	0	0	179.4	253.4	0	253.4
Ceratitis.cosyra	15	1	0	2	0	0	0	253.4	265	0	265
Ceratitis.cosyra	15	1	0	2	0	0	0	265	268.8	0	268.8
Ceratitis.cosyra	15	1	0	2	0	0	0	268.8	274.9	0	274.9
Ceratitis.cosyra	15	2	0	2	0	0	0	274.9	284.3	0	284.3
Ceratitis.cosyra	15	2	0	2	0	1	0	284.3	369.9	0	369.9
Ceratitis.cosyra	15	2	0	3	0	1	0	369.9	378.6	0	378.6
Ceratitis.cosyra	15	1	0	3	0	1	0	378.6	391.3	0	391.3
Ceratitis.cosyra	15	1	0	3	0	1	0	391.3	433.8	0	433.8
Ceratitis.cosyra	15	1	0	4	0	1	0	433.8	440.5	0	440.5
Ceratitis.cosyra	15	2	0	4	0	1	0	440.5	446.6	0	446.6
Ceratitis.cosyra	15	2	0	4	0	1	0	446.6	482.8	0	482.8
Ceratitis.cosyra	15	2	0	4	0	1	0	482.8	486.1	0	486.1
Ceratitis.cosyra	15	2	0	4	0	1	0	486.1	488	0	488
Ceratitis.cosyra	15	2	0	4	0	2	0	488	488.9	0	488.9
Ceratitis.cosyra	15	2	0	4	0	2	0	488.9	737	1	737
Ceratitis.cosyra	15	2	0	0	0	0	1	0	3.8	0	3.8
Ceratitis.cosyra	15	2	0	0	0	0	1	3.8	7.9	1	7.9
Ceratitis.cosyra	15	0	0	0	1	0	2	0	10	0	10
Ceratitis.cosyra	15	1	0	0	1	0	2	10	50.1	0	50.1
Ceratitis.cosyra	15	1	0	0	1	0	2	50.1	71.7	0	71.7
Ceratitis.cosyra	15	1	0	1	1	0	2	71.7	73.7	0	73.7
Ceratitis.cosyra	15	2	0	1	1	0	2	73.7	229.8	0	229.8
Ceratitis.cosyra	15	2	0	1	1	0	2	229.8	236.1	0	236.1
Ceratitis.cosyra	15	3	0	1	1	0	2	236.1	329.6	0	329.6
Ceratitis.cosyra	15	3	0	1	1	1	2	329.6	332.9	0	332.9
Ceratitis.cosyra	15	3	0	1	1	1	2	332.9	512.2	1	512.2
Ceratitis.cosyra	15	3	0	0	1	0	3	0	3	0	3
Ceratitis.cosyra	15	2	0	0	1	0	3	3	16.9	0	16.9
Ceratitis.cosyra	15	3	0	0	1	0	3	16.9	36.8	0	36.8
Ceratitis.cosyra	15	4	0	0	1	0	3	36.8	49.6	0	49.6
Ceratitis.cosyra	15	4	0	0	1	0	3	49.6	58.2	1	58.2
Ceratitis.cosyra	15	4	0	0	2	0	4	0	49.1	0	49.1
Ceratitis.cosyra	15	4	0	0	2	1	4	49.1	50.3	0	50.3
Ceratitis.cosyra	15	4	0	0	2	1	4	50.3	123.7	1	123.7
Ceratitis.cosyra	16	0	0	0	0	0	0	0	46.2	0	46.2
Ceratitis.cosyra	16	0	0	1	0	0	0	46.2	47.6	0	47.6
Ceratitis.cosyra	16	0	0	1	0	0	0	47.6	94	0	94
Ceratitis.cosyra	16	0	0	1	0	0	0	94	135.8	0	135.8
Ceratitis.cosyra	16	0	0	2	0	0	0	135.8	295.5	0	295.5
Ceratitis.cosyra	16	0	0	2	0	0	0	295.5	298.6	0	298.6
Ceratitis.cosyra	16	0	0	2	0	0	0	298.6	363.3	0	363.3
Ceratitis.cosyra	16	0	0	2	0	0	0	363.3	368.6	0	368.6
Ceratitis.cosyra	16	1	0	2	0	0	0	368.6	370.5	0	370.5
Ceratitis.cosyra	16	1	0	3	0	0	0	370.5	505	0	505
Ceratitis.cosyra	16	0	0	3	0	0	0	505	507.4	0	507.4
Ceratitis.cosyra	16	0	0	3	0	0	0	507.4	580.7	0	580.7
Ceratitis.cosyra	16	1	0	3	0	0	0	580.7	583.2	0	583.2
Ceratitis.cosyra	16	1	0	3	0	0	0	583.2	651.7	0	651.7
Ceratitis.cosyra	16	1	0	4	0	0	0	651.7	661.4	0	661.4
Ceratitis.cosyra	16	1	0	4	0	0	0	661.4	672.2	0	672.2
Ceratitis.cosyra	16	0	0	4	0	0	0	672.2	700.8	0	700.8
Ceratitis.cosyra	16	0	0	4	0	0	0	700.8	706.6	0	706.6
Ceratitis.cosyra	16	0	0	4	0	0	0	706.6	832.3	0	832.3
Ceratitis.cosyra	16	0	0	5	0	0	0	832.3	836.9	0	836.9
Ceratitis.cosyra	16	1	0	5	0	0	0	836.9	931.3	0	931.3
Ceratitis.cosyra	16	1	0	5	0	0	0	931.3	943.5	0	943.5
Ceratitis.cosyra	16	1	0	5	0	0	0	943.5	1002.7	0	1002.7
Ceratitis.cosyra	16	2	0	5	0	0	0	1002.7	1040.7	0	1040.7
Ceratitis.cosyra	16	2	0	6	0	0	0	1040.7	1045.8	0	1045.8
Ceratitis.cosyra	16	2	0	6	0	1	0	1045.8	1047.6	0	1047.6
Ceratitis.cosyra	16	2	0	6	0	1	0	1047.6	1189.4	1	1189.4
Ceratitis.cosyra	16	2	0	0	0	0	1	0	2.7	0	2.7
Ceratitis.cosyra	16	1	0	0	0	0	1	2.7	138.9	0	138.9
Ceratitis.cosyra	16	1	0	1	0	0	1	138.9	141.2	0	141.2
Ceratitis.cosyra	16	2	0	1	0	0	1	141.2	151.5	0	151.5
Ceratitis.cosyra	16	2	0	1	0	1	1	151.5	153.1	0	153.1
Ceratitis.cosyra	16	2	0	1	0	1	1	153.1	288.7	1	288.7
Ceratitis.cosyra	16	2	0	0	0	0	2	0	65.9	0	65.9
Ceratitis.cosyra	16	2	0	1	0	0	2	65.9	67.5	0	67.5
Ceratitis.cosyra	16	3	0	1	0	0	2	67.5	74.6	0	74.6
Ceratitis.cosyra	16	3	0	1	0	0	2	74.6	76.4	0	76.4
Ceratitis.cosyra	16	3	0	1	0	0	2	76.4	81.7	0	81.7
Ceratitis.cosyra	16	3	0	1	0	0	2	81.7	88.2	1	88.2
Ceratitis.cosyra	16	2	0	0	0	0	3	0	5.8	0	5.8
Ceratitis.cosyra	16	2	0	0	0	1	3	5.8	6.7	0	6.7
Ceratitis.cosyra	16	2	0	0	0	1	3	6.7	10.4	1	10.4
Ceratitis.cosyra	17	1	0	0	0	0	0	0	78	0	78
Ceratitis.cosyra	17	1	0	0	0	0	0	78	148.5	1	148.5
Ceratitis.cosyra	17	1	0	0	0	0	1	0	89.7	0	89.7
Ceratitis.cosyra	17	1	0	1	0	0	1	89.7	176.3	0	176.3
Ceratitis.cosyra	17	1	0	1	0	0	1	176.3	217.3	0	217.3
Ceratitis.cosyra	17	1	0	1	0	1	1	217.3	257.3	0	257.3
Ceratitis.cosyra	17	1	0	2	0	1	1	257.3	260.8	0	260.8
Ceratitis.cosyra	17	2	0	2	0	1	1	260.8	270.5	0	270.5
Ceratitis.cosyra	17	1	0	2	0	1	1	270.5	278.2	0	278.2
Ceratitis.cosyra	17	1	0	2	0	1	1	278.2	298.2	0	298.2
Ceratitis.cosyra	17	2	0	2	0	1	1	298.2	307	0	307
Ceratitis.cosyra	17	2	0	2	0	1	1	307	308.7	0	308.7
Ceratitis.cosyra	17	2	0	2	0	2	1	308.7	310.1	0	310.1
Ceratitis.cosyra	17	2	0	2	0	2	1	310.1	395.8	1	395.8
Ceratitis.cosyra	17	2	0	0	0	0	2	0	3.2	0	3.2
Ceratitis.cosyra	17	4	0	0	0	0	2	3.2	63.1	0	63.1
Ceratitis.cosyra	17	4	0	0	0	0	2	63.1	66	0	66
Ceratitis.cosyra	17	4	0	0	0	1	2	66	66.9	0	66.9
Ceratitis.cosyra	17	4	0	0	0	1	2	66.9	109.7	1	109.7
Ceratitis.cosyra	17	4	0	0	0	0	3	0	4.6	0	4.6
Ceratitis.cosyra	17	3	0	0	0	0	3	4.6	22.9	0	22.9
Ceratitis.cosyra	17	3	0	0	0	0	3	22.9	24.5	0	24.5
Ceratitis.cosyra	17	3	0	0	0	1	3	24.5	25.7	0	25.7
Ceratitis.cosyra	17	3	0	0	0	1	3	25.7	29.9	1	29.9
Ceratitis.cosyra	17	3	0	0	0	0	4	0	34.5	0	34.5
Ceratitis.cosyra	17	3	0	0	0	0	4	34.5	36.5	0	36.5
Ceratitis.cosyra	17	3	0	0	0	1	4	36.5	39.1	0	39.1
Ceratitis.cosyra	17	2	0	0	0	1	4	39.1	66.1	0	66.1
Ceratitis.cosyra	17	2	0	0	0	2	4	66.1	69.6	0	69.6
Ceratitis.cosyra	17	2	0	0	0	2	4	69.6	141.4	1	141.4
Ceratitis.cosyra	17	2	0	0	0	0	5	0	33.6	0	33.6
Ceratitis.cosyra	17	2	0	0	0	0	5	33.6	37.2	1	37.2
Ceratitis.cosyra	17	2	0	0	1	0	6	0	28	0	28
Ceratitis.cosyra	17	2	0	0	1	1	6	28	28.6	0	28.6
Ceratitis.cosyra	17	2	0	0	1	1	6	28.6	32.6	1	32.6
Ceratitis.cosyra	17	2	0	0	3	0	7	0	11.7	0	11.7
Ceratitis.cosyra	17	2	0	1	3	0	7	11.7	33.5	0	33.5
Ceratitis.cosyra	17	3	0	1	3	0	7	33.5	125	0	125
Ceratitis.cosyra	17	3	0	1	3	1	7	125	126.4	0	126.4
Ceratitis.cosyra	17	3	0	1	3	1	7	126.4	129.8	1	129.8
Ceratitis.cosyra	17	3	0	0	4	0	8	0	66.5	0	66.5
Ceratitis.cosyra	17	3	0	1	4	0	8	66.5	101.6	0	101.6
Ceratitis.cosyra	17	3	0	1	4	0	8	101.6	105.3	0	105.3
Ceratitis.cosyra	17	4	0	1	4	0	8	105.3	113.1	0	113.1
Ceratitis.cosyra	17	4	0	2	4	0	8	113.1	131.1	0	131.1
Ceratitis.cosyra	17	4	0	2	4	1	8	131.1	134.1	0	134.1
Ceratitis.cosyra	17	4	0	2	4	1	8	134.1	207.7	1	207.7
Ceratitis.cosyra	18	1	0	0	0	0	0	0	4.4	0	4.4
Ceratitis.cosyra	18	1	0	0	0	0	0	4.4	8.3	1	8.3
Ceratitis.cosyra	18	1	0	0	0	0	1	0	182.8	0	182.8
Ceratitis.cosyra	18	1	0	1	0	0	1	182.8	184.9	0	184.9
Ceratitis.cosyra	18	1	0	1	0	0	1	184.9	197	0	197
Ceratitis.cosyra	18	1	0	1	0	0	1	197	207.2	0	207.2
Ceratitis.cosyra	18	1	0	1	0	0	1	207.2	218.3	0	218.3
Ceratitis.cosyra	18	1	0	2	0	0	1	218.3	246.3	0	246.3
Ceratitis.cosyra	18	1	0	2	0	0	1	246.3	320.5	0	320.5
Ceratitis.cosyra	18	1	0	2	0	0	1	320.5	387.9	0	387.9
Ceratitis.cosyra	18	1	0	3	0	0	1	387.9	398.4	0	398.4
Ceratitis.cosyra	18	2	0	3	0	0	1	398.4	407.7	0	407.7
Ceratitis.cosyra	18	2	0	3	0	1	1	407.7	408.9	0	408.9
Ceratitis.cosyra	18	2	0	3	0	1	1	408.9	576.7	1	576.7
Ceratitis.cosyra	18	2	0	0	0	0	2	0	2.7	0	2.7
Ceratitis.cosyra	18	2	0	0	0	0	2	2.7	86.7	0	86.7
Ceratitis.cosyra	18	2	0	0	0	1	2	86.7	88.2	0	88.2
Ceratitis.cosyra	18	2	0	0	0	1	2	88.2	193.5	1	193.5
Ceratitis.cosyra	18	2	0	0	1	0	3	0	10.7	0	10.7
Ceratitis.cosyra	18	3	0	0	1	0	3	10.7	17.9	0	17.9
Ceratitis.cosyra	18	2	0	0	1	0	3	17.9	37.2	0	37.2
Ceratitis.cosyra	18	2	0	0	1	0	3	37.2	53.5	0	53.5
Ceratitis.cosyra	18	2	0	1	1	0	3	53.5	62.7	0	62.7
Ceratitis.cosyra	18	3	0	1	1	0	3	62.7	75.6	0	75.6
Ceratitis.cosyra	18	3	0	1	1	1	3	75.6	75.9	0	75.9
Ceratitis.cosyra	18	3	0	1	1	1	3	75.9	180.2	1	180.2
Ceratitis.cosyra	18	3	0	0	1	0	4	0	5.9	0	5.9
Ceratitis.cosyra	18	3	0	0	1	0	4	5.9	13.1	1	13.1
Ceratitis.cosyra	18	3	0	0	2	0	5	0	2.7	0	2.7
Ceratitis.cosyra	18	3	0	0	2	0	5	2.7	30	0	30
Ceratitis.cosyra	18	3	0	0	2	1	5	30	30.6	0	30.6
Ceratitis.cosyra	18	3	0	0	2	1	5	30.6	34.7	1	34.7
Ceratitis.cosyra	18	3	0	0	2	0	6	0	39.6	0	39.6
Ceratitis.cosyra	18	3	0	1	2	0	6	39.6	50.2	0	50.2
Ceratitis.cosyra	18	3	0	1	2	1	6	50.2	51.8	0	51.8
Ceratitis.cosyra	18	3	0	1	2	1	6	51.8	88.7	1	88.7
Ceratitis.cosyra	18	3	0	0	2	0	7	0	43.9	0	43.9
Ceratitis.cosyra	18	3	0	0	2	1	7	43.9	45.8	0	45.8
Ceratitis.cosyra	18	3	0	0	2	1	7	45.8	90.3	1	90.3
Ceratitis.cosyra	18	3	0	0	3	0	8	0	10.8	0	10.8
Ceratitis.cosyra	18	3	0	0	3	1	8	10.8	14.4	0	14.4
Ceratitis.cosyra	18	4	0	0	3	1	8	14.4	36.1	0	36.1
Ceratitis.cosyra	18	3	0	0	3	1	8	36.1	45.5	0	45.5
Ceratitis.cosyra	19	0	0	0	1	0	0	0	3.8	0	3.8
Ceratitis.cosyra	19	0	0	0	1	0	0	3.8	32.8	0	32.8
Ceratitis.cosyra	19	0	0	1	1	0	0	32.8	88.9	0	88.9
Ceratitis.cosyra	19	0	0	1	1	0	0	88.9	94.5	0	94.5
Ceratitis.cosyra	19	1	0	1	1	0	0	94.5	112.9	0	112.9
Ceratitis.cosyra	19	1	0	2	1	0	0	112.9	155.8	0	155.8
Ceratitis.cosyra	19	1	0	2	1	0	0	155.8	394.8	0	394.8
Ceratitis.cosyra	19	1	0	2	1	0	0	394.8	487.8	1	487.8
Ceratitis.cosyra	19	1	0	0	2	0	1	0	69	0	69
Ceratitis.cosyra	19	1	0	0	2	1	1	69	69.5	0	69.5
Ceratitis.cosyra	19	1	0	0	2	1	1	69.5	71.2	1	71.2
Ceratitis.cosyra	19	3	0	0	2	0	2	0	2.8	0	2.8
Ceratitis.cosyra	19	2	0	0	2	0	2	2.8	38.7	0	38.7
Ceratitis.cosyra	19	2	0	1	2	0	2	38.7	60.8	0	60.8
Ceratitis.cosyra	19	2	0	1	2	0	2	60.8	63.4	0	63.4
Ceratitis.cosyra	19	3	0	1	2	0	2	63.4	74.6	0	74.6
Ceratitis.cosyra	19	3	0	1	2	1	2	74.6	75.3	0	75.3
Ceratitis.cosyra	19	3	0	1	2	1	2	75.3	108.4	1	108.4
Ceratitis.cosyra	19	3	0	0	2	0	3	0	4.3	0	4.3
Ceratitis.cosyra	19	4	0	0	2	0	3	4.3	50.6	0	50.6
Ceratitis.cosyra	19	4	0	0	2	1	3	50.6	51.5	0	51.5
Ceratitis.cosyra	19	4	0	0	2	1	3	51.5	56	1	56
Ceratitis.cosyra	19	4	0	0	3	0	4	0	100.4	0	100.4
Ceratitis.cosyra	19	4	0	1	3	0	4	100.4	102.1	0	102.1
Ceratitis.cosyra	19	2	0	1	3	0	4	102.1	108.7	0	108.7
Ceratitis.cosyra	19	2	0	1	3	0	4	108.7	109.9	0	109.9
Ceratitis.cosyra	19	2	0	1	3	1	4	109.9	115.2	0	115.2
Ceratitis.cosyra	19	3	0	1	3	1	4	115.2	178.2	0	178.2
Ceratitis.cosyra	19	3	0	1	3	2	4	178.2	178.7	0	178.7
Ceratitis.cosyra	19	3	0	1	3	2	4	178.7	213.3	1	213.3
Ceratitis.cosyra	19	3	0	0	4	0	5	0	151.3	0	151.3
Ceratitis.cosyra	19	3	0	0	4	1	5	151.3	153.1	0	153.1
Ceratitis.cosyra	19	4	0	0	4	1	5	153.1	247.5	0	247.5
Ceratitis.cosyra	19	5	0	0	4	1	5	247.5	269.5	0	269.5
Ceratitis.cosyra	19	5	0	0	4	2	5	269.5	270.3	0	270.3
Ceratitis.cosyra	19	5	0	0	4	2	5	270.3	339.8	1	339.8
Ceratitis.cosyra	20	1	0	0	0	0	0	0	5.5	0	5.5
Ceratitis.cosyra	20	1	0	0	0	0	0	5.5	9.5	1	9.5
Ceratitis.cosyra	20	1	0	0	1	0	1	0	6.3	0	6.3
Ceratitis.cosyra	20	1	0	0	1	0	1	6.3	81.9	0	81.9
Ceratitis.cosyra	20	1	0	1	1	0	1	81.9	123.6	0	123.6
Ceratitis.cosyra	20	1	0	1	1	0	1	123.6	311.5	0	311.5
Ceratitis.cosyra	20	1	0	1	1	0	1	311.5	336.3	1	336.3
Ceratitis.cosyra	20	2	0	0	1	0	2	0	54	0	54
Ceratitis.cosyra	20	2	0	1	1	0	2	54	60	0	60
Ceratitis.cosyra	20	2	0	1	1	0	2	60	123.9	0	123.9
Ceratitis.cosyra	20	2	0	1	1	0	2	123.9	127.5	0	127.5
Ceratitis.cosyra	20	2	0	1	1	1	2	127.5	224.3	0	224.3
Ceratitis.cosyra	20	2	0	1	1	2	2	224.3	227.6	0	227.6
Ceratitis.cosyra	20	2	0	1	1	2	2	227.6	260.8	0	260.8
Ceratitis.cosyra	20	3	0	1	1	2	2	260.8	321	0	321
Ceratitis.cosyra	20	3	0	1	1	3	2	321	414.7	0	414.7
Ceratitis.cosyra	20	3	0	1	1	3	2	414.7	428.2	1	428.2
Ceratitis.cosyra	20	3	0	0	2	0	3	0	2.9	0	2.9
Ceratitis.cosyra	20	3	0	0	2	0	3	2.9	41.7	1	41.7
Ceratitis.cosyra	20	3	0	0	2	0	4	0	3	0	3
Ceratitis.cosyra	20	3	0	0	2	0	4	3	27.9	0	27.9
Ceratitis.cosyra	20	4	0	0	2	0	4	27.9	38.6	0	38.6
Ceratitis.cosyra	20	4	0	0	2	1	4	38.6	39.1	0	39.1
Ceratitis.cosyra	20	4	0	0	2	1	4	39.1	86.3	1	86.3
Ceratitis.cosyra	20	4	0	0	3	0	5	0	43	0	43
Ceratitis.cosyra	20	4	0	0	3	0	5	43	45.3	1	45.3
Ceratitis.cosyra	20	4	0	0	5	0	6	0	4.7	0	4.7
Ceratitis.cosyra	20	5	0	0	5	0	6	4.7	142.5	0	142.5
Ceratitis.cosyra	20	3	0	0	5	0	6	142.5	154.2	0	154.2
Ceratitis.cosyra	20	3	0	1	5	0	6	154.2	181.5	0	181.5
Ceratitis.cosyra	20	3	0	1	5	0	6	181.5	207.3	0	207.3
Ceratitis.cosyra	20	3	0	1	5	0	6	207.3	227.8	1	227.8
Ceratitis.cosyra	20	5	0	0	6	0	7	0	32	0	32
Ceratitis.cosyra	20	5	0	0	6	0	7	32	36.1	0	36.1
Ceratitis.cosyra	20	5	0	0	6	0	7	36.1	123.7	1	123.7
Ceratitis.cosyra	21	2	0	0	2	0	0	0	220.8	0	220.8
Ceratitis.cosyra	21	3	0	0	2	0	0	220.8	338.4	0	338.4
Ceratitis.cosyra	21	3	0	1	2	0	0	338.4	354.6	0	354.6
Ceratitis.cosyra	21	3	0	1	2	0	0	354.6	384.7	0	384.7
Ceratitis.cosyra	21	4	0	1	2	0	0	384.7	429.8	0	429.8
Ceratitis.cosyra	21	4	0	1	2	1	0	429.8	463.3	0	463.3
Ceratitis.cosyra	21	3	0	1	2	1	0	463.3	532.7	0	532.7
Ceratitis.cosyra	21	1	0	1	2	1	0	532.7	570.3	0	570.3
Ceratitis.cosyra	21	1	0	1	2	1	0	570.3	605	0	605
Ceratitis.cosyra	21	1	0	2	2	1	0	605	612.5	0	612.5
Ceratitis.cosyra	21	1	0	2	2	1	0	612.5	618.8	0	618.8
Ceratitis.cosyra	21	1	0	3	2	1	0	618.8	642.3	0	642.3
Ceratitis.cosyra	21	1	0	3	2	1	0	642.3	686.4	0	686.4
Ceratitis.cosyra	21	1	0	4	2	1	0	686.4	712.1	0	712.1
Ceratitis.cosyra	21	1	1	4	2	1	0	712.1	717.8	0	717.8
Ceratitis.cosyra	21	1	1	4	2	1	0	717.8	753	0	753
Ceratitis.cosyra	21	4	1	4	2	1	0	753	760	0	760
Ceratitis.cosyra	21	4	1	5	2	1	0	760	787.8	0	787.8
Ceratitis.cosyra	21	4	1	5	2	2	0	787.8	788.5	0	788.5
Ceratitis.cosyra	21	4	1	5	2	2	0	788.5	824.7	1	824.7
Ceratitis.cosyra	21	4	0	0	2	0	1	0	5.5	0	5.5
Ceratitis.cosyra	21	2	0	0	2	0	1	5.5	144.4	0	144.4
Ceratitis.cosyra	21	2	0	0	2	1	1	144.4	218.3	0	218.3
Ceratitis.cosyra	21	2	0	0	2	2	1	218.3	221.7	0	221.7
Ceratitis.cosyra	21	2	0	0	2	2	1	221.7	234.4	1	234.4
Ceratitis.cosyra	21	2	0	0	2	0	2	0	1.8	0	1.8
Ceratitis.cosyra	21	2	0	0	2	0	2	1.8	2.4	0	2.4
Ceratitis.cosyra	21	2	0	0	2	0	2	2.4	29.9	1	29.9
Ceratitis.cosyra	22	1	0	0	0	0	0	0	147.2	0	147.2
Ceratitis.cosyra	22	1	0	0	0	0	0	147.2	167.7	1	167.7
Ceratitis.cosyra	22	1	0	0	0	0	1	0	36.1	0	36.1
Ceratitis.cosyra	22	1	0	0	0	0	1	36.1	97	1	97
Ceratitis.cosyra	22	1	0	0	0	0	2	0	36.5	0	36.5
Ceratitis.cosyra	22	1	0	0	0	0	2	36.5	325.7	1	325.7
Ceratitis.cosyra	22	1	0	0	0	0	3	0	159	0	159
Ceratitis.cosyra	22	1	0	0	0	0	3	159	223.3	1	223.3
Ceratitis.cosyra	22	1	0	0	0	0	4	0	32	0	32
Ceratitis.cosyra	22	1	0	1	0	0	4	32	42.2	0	42.2
Ceratitis.cosyra	22	1	0	1	0	0	4	42.2	190.2	0	190.2
Ceratitis.cosyra	22	0	0	1	0	0	4	190.2	204.3	0	204.3
Ceratitis.cosyra	22	1	0	1	0	0	4	204.3	258.6	0	258.6
Ceratitis.cosyra	22	1	0	1	0	1	4	258.6	260.3	0	260.3
Ceratitis.cosyra	22	1	0	1	0	1	4	260.3	295.5	1	295.5
Ceratitis.cosyra	22	3	0	0	0	0	5	0	135.9	0	135.9
Ceratitis.cosyra	22	3	0	1	0	0	5	135.9	142.6	0	142.6
Ceratitis.cosyra	22	3	0	1	0	0	5	142.6	220.1	0	220.1
Ceratitis.cosyra	22	3	0	1	0	0	5	220.1	229.9	0	229.9
Ceratitis.cosyra	22	0	0	1	0	0	5	229.9	264.6	0	264.6
Ceratitis.cosyra	22	0	0	1	0	0	5	264.6	268.7	1	268.7
Ceratitis.cosyra	23	0	0	0	0	0	0	0	29.8	0	29.8
Ceratitis.cosyra	23	1	0	0	0	0	0	29.8	41.7	0	41.7
Ceratitis.cosyra	23	0	0	0	0	0	0	41.7	69.9	0	69.9
Ceratitis.cosyra	23	1	0	0	0	0	0	69.9	136.7	0	136.7
Ceratitis.cosyra	23	0	0	0	0	0	0	136.7	216.6	0	216.6
Ceratitis.cosyra	23	1	0	0	0	0	0	216.6	220.2	0	220.2
Ceratitis.cosyra	23	1	0	0	0	1	0	220.2	339.7	0	339.7
Ceratitis.cosyra	23	1	0	0	0	1	0	339.7	341.3	0	341.3
Ceratitis.cosyra	23	1	0	0	0	2	0	341.3	343	0	343
Ceratitis.cosyra	23	1	0	0	0	2	0	343	348.1	1	348.1
Ceratitis.cosyra	24	1	0	0	2	0	0	0	2.6	0	2.6
Ceratitis.cosyra	24	1	0	0	2	0	0	2.6	14.1	0	14.1
Ceratitis.cosyra	24	0	0	0	2	0	0	14.1	177.8	0	177.8
Ceratitis.cosyra	24	1	0	0	2	0	0	177.8	180.1	0	180.1
Ceratitis.cosyra	24	1	0	0	2	0	0	180.1	202.7	0	202.7
Ceratitis.cosyra	24	0	0	0	2	0	0	202.7	207.4	0	207.4
Ceratitis.cosyra	24	0	0	1	2	0	0	207.4	214.7	0	214.7
Ceratitis.cosyra	24	0	0	1	2	0	0	214.7	249	0	249
Ceratitis.cosyra	24	1	0	1	2	0	0	249	260.5	0	260.5
Ceratitis.cosyra	24	0	0	1	2	0	0	260.5	286.7	0	286.7
Ceratitis.cosyra	24	0	0	2	2	0	0	286.7	305.9	0	305.9
Ceratitis.cosyra	24	1	0	2	2	0	0	305.9	311.4	0	311.4
Ceratitis.cosyra	24	1	0	2	2	1	0	311.4	325	0	325
Ceratitis.cosyra	24	0	0	2	2	1	0	325	329.5	0	329.5
Ceratitis.cosyra	24	0	0	2	2	1	0	329.5	343.7	0	343.7
Ceratitis.cosyra	24	1	0	2	2	1	0	343.7	347.1	0	347.1
Ceratitis.cosyra	24	1	0	2	2	1	0	347.1	396.7	0	396.7
Ceratitis.cosyra	24	0	0	2	2	1	0	396.7	400.9	0	400.9
Ceratitis.cosyra	24	0	0	2	2	1	0	400.9	405.7	0	405.7
Ceratitis.cosyra	24	0	0	3	2	1	0	405.7	411.2	0	411.2
Ceratitis.cosyra	24	1	0	3	2	1	0	411.2	414.1	0	414.1
Ceratitis.cosyra	24	1	0	3	2	2	0	414.1	424.1	0	424.1
Ceratitis.cosyra	24	0	0	3	2	2	0	424.1	443.8	0	443.8
Ceratitis.cosyra	24	0	0	4	2	2	0	443.8	477.2	0	477.2
Ceratitis.cosyra	24	1	0	4	2	2	0	477.2	487.3	0	487.3
Ceratitis.cosyra	24	1	0	4	2	2	0	487.3	519	0	519
Ceratitis.cosyra	24	0	0	4	2	2	0	519	540.7	0	540.7
Ceratitis.cosyra	24	0	0	5	2	2	0	540.7	549.8	0	549.8
Ceratitis.cosyra	24	0	0	5	2	2	0	549.8	614	0	614
Ceratitis.cosyra	24	1	0	5	2	2	0	614	616.1	0	616.1
Ceratitis.cosyra	24	1	0	5	2	2	0	616.1	624.8	0	624.8
Ceratitis.cosyra	24	1	0	5	2	2	0	624.8	627.1	0	627.1
Ceratitis.cosyra	24	1	0	5	2	3	0	627.1	628.7	0	628.7
Ceratitis.cosyra	24	1	0	5	2	3	0	628.7	634.6	0	634.6
Ceratitis.cosyra	24	0	0	5	2	3	0	634.6	647.4	0	647.4
Ceratitis.cosyra	24	0	0	6	2	3	0	647.4	663.9	0	663.9
Ceratitis.cosyra	24	1	0	6	2	3	0	663.9	670.4	0	670.4
Ceratitis.cosyra	24	1	0	6	2	4	0	670.4	692.5	0	692.5
Ceratitis.cosyra	24	0	0	6	2	4	0	692.5	703.4	0	703.4
Ceratitis.cosyra	24	0	0	6	2	4	0	703.4	724.5	0	724.5
Ceratitis.cosyra	24	1	0	6	2	4	0	724.5	729.2	0	729.2
Ceratitis.cosyra	24	1	0	6	2	4	0	729.2	733.6	0	733.6
Ceratitis.cosyra	24	1	0	6	2	5	0	733.6	733.9	0	733.9
Ceratitis.cosyra	24	1	0	6	2	5	0	733.9	761.1	0	761.1
Ceratitis.cosyra	24	0	0	6	2	5	0	761.1	772.2	0	772.2
Ceratitis.cosyra	24	1	0	6	2	5	0	772.2	790.9	0	790.9
Ceratitis.cosyra	24	1	0	6	2	5	0	790.9	792.1	0	792.1
Ceratitis.cosyra	24	1	0	6	2	6	0	792.1	816.1	0	816.1
Ceratitis.cosyra	24	1	0	6	2	6	0	816.1	819.6	0	819.6
Ceratitis.cosyra	24	0	0	6	2	6	0	819.6	839.1	0	839.1
Ceratitis.cosyra	24	0	0	7	2	6	0	839.1	872.5	0	872.5
Ceratitis.cosyra	24	0	1	7	2	6	0	872.5	922.1	0	922.1
Ceratitis.cosyra	24	0	1	7	2	6	0	922.1	927.9	0	927.9
Ceratitis.cosyra	24	1	1	7	2	6	0	927.9	930.1	0	930.1
Ceratitis.cosyra	24	1	1	7	2	6	0	930.1	933.9	0	933.9
Ceratitis.cosyra	24	1	1	7	2	7	0	933.9	941.8	0	941.8
Ceratitis.cosyra	24	2	1	7	2	7	0	941.8	949.3	0	949.3
Ceratitis.cosyra	24	0	1	7	2	7	0	949.3	960.2	0	960.2
Ceratitis.cosyra	24	0	2	7	2	7	0	960.2	993.1	0	993.1
Ceratitis.cosyra	24	1	2	7	2	7	0	993.1	1001.5	0	1001.5
Ceratitis.cosyra	24	1	2	7	2	7	0	1001.5	1049.6	0	1049.6
Ceratitis.cosyra	24	0	2	7	2	7	0	1049.6	1060.6	0	1060.6
Ceratitis.cosyra	24	0	2	7	2	7	0	1060.6	1101.7	0	1101.7
Ceratitis.cosyra	24	0	3	7	2	7	0	1101.7	1191.2	0	1191.2
Ceratitis.cosyra	24	1	3	7	2	7	0	1191.2	1195.4	0	1195.4
Ceratitis.cosyra	24	1	3	7	2	8	0	1195.4	1203.6	0	1203.6
Ceratitis.cosyra	25	1	0	0	0	0	0	0	3.3	0	3.3
Ceratitis.cosyra	25	1	0	0	0	0	0	3.3	29.3	0	29.3
Ceratitis.cosyra	25	0	0	0	0	0	0	29.3	32.1	0	32.1
Ceratitis.cosyra	25	0	0	0	0	0	0	32.1	73.7	0	73.7
Ceratitis.cosyra	25	1	0	0	0	0	0	73.7	97.1	0	97.1
Ceratitis.cosyra	25	0	0	0	0	0	0	97.1	99.4	0	99.4
Ceratitis.cosyra	25	0	0	0	0	0	0	99.4	124.6	0	124.6
Ceratitis.cosyra	25	0	0	1	0	0	0	124.6	131.2	0	131.2
Ceratitis.cosyra	25	0	0	1	0	0	0	131.2	183.5	0	183.5
Ceratitis.cosyra	25	0	0	1	0	0	0	183.5	235.9	0	235.9
Ceratitis.cosyra	25	0	0	1	0	0	0	235.9	279.8	0	279.8
Ceratitis.cosyra	25	0	0	1	0	0	0	279.8	290.4	0	290.4
Ceratitis.cosyra	25	0	1	1	0	0	0	290.4	331.1	0	331.1
Ceratitis.cosyra	25	0	1	1	0	0	0	331.1	380.5	0	380.5
Ceratitis.cosyra	25	0	1	1	0	0	0	380.5	543.2	0	543.2
Ceratitis.cosyra	25	0	1	1	0	0	0	543.2	607.1	0	607.1
Ceratitis.cosyra	25	1	1	1	0	0	0	607.1	618.7	0	618.7
Ceratitis.cosyra	25	0	1	1	0	0	0	618.7	620.2	0	620.2
Ceratitis.cosyra	25	0	1	1	0	0	0	620.2	631.6	0	631.6
Ceratitis.cosyra	25	0	1	1	0	0	0	631.6	678.8	0	678.8
Ceratitis.cosyra	25	1	1	1	0	0	0	678.8	681.7	0	681.7
Ceratitis.cosyra	25	1	1	1	0	0	0	681.7	693	0	693
Ceratitis.cosyra	25	0	1	1	0	0	0	693	696.9	0	696.9
Ceratitis.cosyra	25	0	1	1	0	0	0	696.9	700.1	0	700.1
Ceratitis.cosyra	25	0	1	1	0	0	0	700.1	704.9	0	704.9
Ceratitis.cosyra	25	1	1	1	0	0	0	704.9	720.4	0	720.4
Ceratitis.cosyra	25	0	1	1	0	0	0	720.4	753.3	0	753.3
Ceratitis.cosyra	25	0	1	1	0	0	0	753.3	770.3	0	770.3
Ceratitis.cosyra	25	0	1	1	0	0	0	770.3	803.6	0	803.6
Ceratitis.cosyra	25	1	1	1	0	0	0	803.6	814	0	814
Ceratitis.cosyra	25	2	1	1	0	0	0	814	825	0	825
Ceratitis.cosyra	25	1	1	1	0	0	0	825	859.9	0	859.9
Ceratitis.cosyra	25	2	1	1	0	0	0	859.9	880.3	0	880.3
Ceratitis.cosyra	25	0	1	1	0	0	0	880.3	891.5	0	891.5
Ceratitis.cosyra	25	0	1	2	0	0	0	891.5	901.5	0	901.5
Ceratitis.cosyra	25	1	1	2	0	0	0	901.5	905.5	0	905.5
Ceratitis.cosyra	25	1	1	2	0	0	0	905.5	920.3	0	920.3
Ceratitis.cosyra	25	0	1	2	0	0	0	920.3	921.7	0	921.7
Ceratitis.cosyra	25	0	2	2	0	0	0	921.7	929	0	929
Ceratitis.cosyra	25	0	2	2	0	0	0	929	932.4	0	932.4
Ceratitis.cosyra	25	1	2	2	0	0	0	932.4	943.7	0	943.7
Ceratitis.cosyra	25	0	2	2	0	0	0	943.7	945.3	0	945.3
Ceratitis.cosyra	25	0	2	2	0	0	0	945.3	991	0	991
Ceratitis.cosyra	25	1	2	2	0	0	0	991	1016.2	0	1016.2
Ceratitis.cosyra	25	0	2	2	0	0	0	1016.2	1028.8	0	1028.8
Ceratitis.cosyra	25	0	2	2	0	0	0	1028.8	1098.3	0	1098.3
Ceratitis.cosyra	25	0	2	2	0	0	0	1098.3	1153	0	1153
Ceratitis.cosyra	25	0	2	2	0	0	0	1153	1162.5	0	1162.5
Ceratitis.cosyra	25	0	2	2	0	0	0	1162.5	1267.6	0	1267.6
Ceratitis.cosyra	25	0	2	2	0	0	0	1267.6	1321.2	0	1321.2
Ceratitis.cosyra	25	0	2	2	0	0	0	1321.2	1323.3	0	1323.3
Ceratitis.cosyra	25	0	2	3	0	0	0	1323.3	1342.5	0	1342.5
Ceratitis.cosyra	25	0	2	3	0	0	0	1342.5	1379.8	0	1379.8
Ceratitis.cosyra	25	1	2	3	0	0	0	1379.8	1389.9	0	1389.9
Ceratitis.cosyra	25	1	2	3	0	0	0	1389.9	1391.8	0	1391.8
Ceratitis.cosyra	25	1	2	3	0	1	0	1391.8	1395.4	0	1395.4
Ceratitis.cosyra	25	1	2	3	0	1	0	1395.4	1404.4	1	1404.4
Ceratitis.cosyra	26	1	0	0	0	0	0	0	15.9	0	15.9
Ceratitis.cosyra	26	0	0	0	0	0	0	15.9	77.9	0	77.9
Ceratitis.cosyra	26	0	0	0	0	0	0	77.9	82.2	0	82.2
Ceratitis.cosyra	26	0	0	1	0	0	0	82.2	134.6	0	134.6
Ceratitis.cosyra	26	1	0	1	0	0	0	134.6	141.4	0	141.4
Ceratitis.cosyra	26	1	0	1	0	1	0	141.4	157.4	0	157.4
Ceratitis.cosyra	26	1	0	1	0	1	0	157.4	177.2	0	177.2
Ceratitis.cosyra	26	1	0	1	0	1	0	177.2	178.4	0	178.4
Ceratitis.cosyra	26	1	0	1	0	2	0	178.4	179.3	0	179.3
Ceratitis.cosyra	26	1	0	1	0	2	0	179.3	187.2	0	187.2
Ceratitis.cosyra	26	0	0	0	0	0	1	0	10.4	1	10.4
Ceratitis.cosyra	26	0	0	0	0	0	1	10.4	41	0	41
Ceratitis.cosyra	26	1	0	0	0	0	1	41	44.2	0	44.2
Ceratitis.cosyra	26	1	0	1	0	0	1	44.2	65.4	0	65.4
Ceratitis.cosyra	26	0	0	1	0	0	1	65.4	132.5	0	132.5
Ceratitis.cosyra	26	1	0	1	0	0	1	132.5	152.4	0	152.4
Ceratitis.cosyra	26	0	0	1	0	0	1	152.4	165.1	0	165.1
Ceratitis.cosyra	26	0	0	1	0	0	1	165.1	228	0	228
Ceratitis.cosyra	26	1	0	1	0	0	1	228	246.1	0	246.1
Ceratitis.cosyra	26	1	0	1	0	0	1	246.1	256	0	256
Ceratitis.cosyra	26	0	0	1	0	0	1	256	301.1	0	301.1
Ceratitis.cosyra	26	1	0	1	0	0	1	301.1	309	0	309
Ceratitis.cosyra	26	2	0	1	0	0	1	309	320.2	0	320.2
Ceratitis.cosyra	26	0	0	1	0	0	1	320.2	330.9	0	330.9
Ceratitis.cosyra	26	1	0	1	0	0	1	330.9	333.9	0	333.9
Ceratitis.cosyra	26	1	0	1	0	0	1	333.9	363.1	0	363.1
Ceratitis.cosyra	26	1	0	1	0	0	1	363.1	452.5	0	452.5
Ceratitis.cosyra	26	0	0	1	0	0	1	452.5	513.9	0	513.9
Ceratitis.cosyra	26	0	0	1	0	0	1	513.9	566.4	0	566.4
Ceratitis.cosyra	26	0	0	1	0	0	1	566.4	583.2	0	583.2
Ceratitis.cosyra	26	1	0	1	0	0	1	583.2	607.1	0	607.1
Ceratitis.cosyra	26	0	0	1	0	0	1	607.1	624.6	0	624.6
Ceratitis.cosyra	26	0	0	1	0	0	1	624.6	792.5	0	792.5
Ceratitis.cosyra	26	0	0	1	0	0	1	792.5	801.5	0	801.5
Ceratitis.cosyra	26	1	0	1	0	0	1	801.5	823.9	0	823.9
Ceratitis.cosyra	26	0	0	1	0	0	1	823.9	861.2	0	861.2
Ceratitis.cosyra	26	0	0	1	0	0	1	861.2	875.3	0	875.3
Ceratitis.cosyra	26	0	0	1	0	0	1	875.3	932.2	0	932.2
Ceratitis.cosyra	26	0	0	1	0	0	1	932.2	944.7	0	944.7
Ceratitis.cosyra	26	0	0	1	0	0	1	944.7	948.4	0	948.4
Ceratitis.cosyra	26	1	0	1	0	0	1	948.4	950.5	0	950.5
Ceratitis.cosyra	26	1	0	1	0	0	1	950.5	994.4	0	994.4
Ceratitis.cosyra	26	0	0	1	0	0	1	994.4	1024	0	1024
Ceratitis.cosyra	26	0	0	1	0	0	1	1024	1050.3	0	1050.3
Ceratitis.cosyra	26	1	0	1	0	0	1	1050.3	1073.6	0	1073.6
Ceratitis.cosyra	26	1	0	1	0	0	1	1073.6	1083.9	0	1083.9
Ceratitis.cosyra	26	1	0	1	0	0	1	1083.9	1092.5	0	1092.5
Ceratitis.cosyra	26	0	0	1	0	0	1	1092.5	1127.7	0	1127.7
Ceratitis.cosyra	26	0	0	2	0	0	1	1127.7	1131.6	0	1131.6
Ceratitis.cosyra	26	0	0	2	0	0	1	1131.6	1143.9	0	1143.9
Ceratitis.cosyra	26	1	0	2	0	0	1	1143.9	1147.9	0	1147.9
Ceratitis.cosyra	26	1	0	2	0	1	1	1147.9	1170.9	0	1170.9
Ceratitis.cosyra	26	1	0	2	0	1	1	1170.9	1180.9	0	1180.9
Ceratitis.cosyra	26	1	0	2	0	2	1	1180.9	1187.1	0	1187.1
Ceratitis.cosyra	26	0	0	2	0	2	1	1187.1	1189.5	0	1189.5
Ceratitis.cosyra	26	1	0	2	0	2	1	1189.5	1194.2	0	1194.2
Ceratitis.cosyra	26	1	0	2	0	2	1	1194.2	1212.9	0	1212.9
Ceratitis.cosyra	26	3	0	2	0	2	1	1212.9	1232.1	0	1232.1
Ceratitis.cosyra	26	3	0	2	0	3	1	1232.1	1246.2	0	1246.2
Ceratitis.cosyra	26	1	0	2	0	3	1	1246.2	1257.2	0	1257.2
Ceratitis.cosyra	26	0	0	2	0	3	1	1257.2	1263.3	0	1263.3
Ceratitis.cosyra	26	0	0	3	0	3	1	1263.3	1269.8	0	1269.8
Ceratitis.cosyra	26	1	0	3	0	3	1	1269.8	1278.9	0	1278.9
Ceratitis.cosyra	26	1	0	3	0	4	1	1278.9	1283	0	1283
Ceratitis.cosyra	26	0	0	0	0	0	0	0	319.2	0	319.2
Ceratitis.cosyra	27	2	0	0	1	0	1	0	117.6	0	117.6
Ceratitis.cosyra	27	0	0	0	1	0	1	117.6	122.5	0	122.5
Ceratitis.cosyra	27	0	0	0	1	0	1	122.5	136.6	0	136.6
Ceratitis.cosyra	27	1	0	0	1	0	1	136.6	138.9	0	138.9
Ceratitis.cosyra	27	1	0	0	1	0	1	138.9	146.5	0	146.5
Ceratitis.cosyra	27	0	0	0	1	0	1	146.5	148.6	0	148.6
Ceratitis.cosyra	27	0	0	0	1	0	1	148.6	206.8	0	206.8
Ceratitis.cosyra	27	1	0	0	1	0	1	206.8	212	0	212
Ceratitis.cosyra	27	3	0	0	1	0	1	212	227.6	0	227.6
Ceratitis.cosyra	27	3	0	0	1	0	1	227.6	228.9	0	228.9
Ceratitis.cosyra	27	3	0	0	1	0	1	228.9	254.4	0	254.4
Ceratitis.cosyra	27	1	0	0	1	0	1	254.4	353.8	0	353.8
Ceratitis.cosyra	27	2	0	0	1	0	1	353.8	362.3	0	362.3
Ceratitis.cosyra	27	3	0	0	1	0	1	362.3	389.5	0	389.5
Ceratitis.cosyra	27	1	0	0	1	0	1	389.5	404.3	0	404.3
Ceratitis.cosyra	27	1	0	0	1	0	1	404.3	405.6	0	405.6
Ceratitis.cosyra	27	1	0	0	1	0	1	405.6	527.1	0	527.1
Ceratitis.cosyra	27	1	0	0	1	0	1	527.1	556.9	0	556.9
Ceratitis.cosyra	27	3	0	0	1	0	1	556.9	562.6	0	562.6
Ceratitis.cosyra	27	3	0	0	1	0	1	562.6	570.7	0	570.7
Ceratitis.cosyra	27	3	0	0	1	0	1	570.7	583.4	0	583.4
Ceratitis.cosyra	27	3	0	0	1	0	1	583.4	584.6	0	584.6
Ceratitis.cosyra	27	3	0	0	1	0	1	584.6	585.3	0	585.3
Ceratitis.cosyra	27	3	0	0	1	0	1	585.3	620	1	620
Ceratitis.cosyra	28	1	0	0	3	0	0	0	97.4	0	97.4
Ceratitis.cosyra	28	4	0	0	3	0	0	97.4	113.1	0	113.1
Ceratitis.cosyra	28	4	0	0	3	0	0	113.1	114.4	0	114.4
Ceratitis.cosyra	28	4	0	0	3	1	0	114.4	115.3	0	115.3
Ceratitis.cosyra	28	4	0	0	3	1	0	115.3	121.2	1	121.2
Ceratitis.cosyra	28	1	0	0	4	0	1	0	2.3	0	2.3
Ceratitis.cosyra	28	0	0	0	4	0	1	2.3	4.3	0	4.3
Ceratitis.cosyra	28	0	0	0	4	0	1	4.3	14.5	0	14.5
Ceratitis.cosyra	28	1	0	0	4	0	1	14.5	30.4	0	30.4
Ceratitis.cosyra	28	0	0	0	4	0	1	30.4	53.3	0	53.3
Ceratitis.cosyra	28	1	0	0	4	0	1	53.3	59	0	59
Ceratitis.cosyra	28	2	0	0	4	0	1	59	73.4	0	73.4
Ceratitis.cosyra	28	2	0	0	4	1	1	73.4	77.1	0	77.1
Ceratitis.cosyra	28	2	0	0	4	1	1	77.1	78.4	0	78.4
Ceratitis.cosyra	28	2	0	0	4	2	1	78.4	79.1	0	79.1
Ceratitis.cosyra	28	2	0	0	4	2	1	79.1	83.8	1	83.8
Fopius.arisanus	1	0	0	NA	3	0	0	0	89.7	0	89.7
Fopius.arisanus	1	1	0	NA	3	0	0	89.7	104.7	0	104.7
Fopius.arisanus	1	0	0	NA	3	0	0	104.7	222	0	222
Fopius.arisanus	1	0	0	NA	3	0	0	222	286.3	0	286.3
Fopius.arisanus	1	0	0	NA	3	0	0	286.3	369.7	0	369.7
Fopius.arisanus	1	1	0	NA	3	0	0	369.7	392.4	0	392.4
Fopius.arisanus	1	1	0	NA	3	0	0	392.4	394.7	0	394.7
Fopius.arisanus	1	1	0	NA	3	1	0	394.7	396.2	0	396.2
Fopius.arisanus	1	1	0	NA	3	1	0	396.2	401.5	1	401.5
Fopius.arisanus	2	1	0	NA	0	0	0	0	8	0	8
Fopius.arisanus	2	1	0	NA	0	0	0	8	10.7	0	10.7
Fopius.arisanus	2	1	0	NA	0	1	0	10.7	12.3	0	12.3
Fopius.arisanus	2	1	0	NA	0	1	0	12.3	20.3	1	20.3
Fopius.arisanus	2	0	0	NA	1	0	1	0	25.7	0	25.7
Fopius.arisanus	2	1	0	NA	1	0	1	25.7	62.7	0	62.7
Fopius.arisanus	2	0	0	NA	1	0	1	62.7	74.6	0	74.6
Fopius.arisanus	2	0	0	NA	1	0	1	74.6	97.1	0	97.1
Fopius.arisanus	2	0	0	NA	1	0	1	97.1	112	0	112
Fopius.arisanus	2	0	0	NA	1	0	1	112	121	0	121
Fopius.arisanus	2	0	0	NA	1	0	1	121	146.9	0	146.9
Fopius.arisanus	2	1	0	NA	1	0	1	146.9	171.7	0	171.7
[truncated: 1,405 more rows]
